# Supplementary material for: Genome-wide identification, characterization and expression analysis of HAK genes and decoding their role in responding to potassium deficiency and abiotic stress in Medicago truncatula
Source: PeerJ. 2022 Sep 22;10:e14034. doi: 10.7717/peerj.14034 (PMC9509677; doi:10.7717/peerj.14034)
Supplement: Supplemental Information 1 [file peerj-10-14034-s001.xlsx]

## Sheet: root
	R				R-1h				R-6h				R-12h				R-24h				R-48h
HAK1	27.32	27.24	27.14	26.96	27.14	27.24	27.32	27.24	27.72	27.68	27.8	28.94	27.95	28.13	28	28.05	27.63	27.53	27.82	27.82	27.62	27.57	27.86	28.03
HAK2	26.45	26.13	26.23	26.16	26.24	26.11	26.19	26.22	27.57	27.67	27.55	27.46	26.83	26.85	26.65	26.85	26.98	26.78	26.81	26.74	25.81	25.81	25.87	25.84
HAK3	34.01	33.9	33.98	33.63	33.78	33.58	33.52	33.29	33.79	33.47	32.76	34.09	33.98	33.52	34.35	33.73	34.5	33.36	33.74	33.78	33.91	34.28	34.57	33.48
HAK4	26.68	26.5	26.65	26.71	27.23	27.06	27.19	27.06	27.59	27.45	27.64	27.1	27.78	27.76	27.77	27.6	27.25	27.36	27.19	27.36	27.28	27.48	27.35	27.04
HAK5	28.73	28.56	28.91	28.81	29.28	28.98	28.83	28.91	28.94	29.13	29.2	29.02	30.24	29.7	30.43	30.01	29.73	29.71	29.48	29.52	28.9	28.67	28.82	28.76
HAK6	23.85	23.84	23.89	23.87	23.31	23.24	23.18	23.36	26.02	26.12	26.11	25.99	23.85	23.83	23.92	23.87	23.56	23.87	23.55	23.57	22.86	22.86	22.8	22.85
HAK7	29.58	29.35	29.51	29.43	29.75	29.84	29.8	29.9	30.71	30.79	30.84	30.78	30.89	30.71	30.82	30.83	30.74	30.61	30.83	30.73	28.86	28.94	28.93	29.21
HAK8	30.9	31.5	31.89	32.4	31.36	30.81	31.69	31.61	32.85	32.65	32.4	32.4	32.89	33	32.99	33.15	32.55	32.61	33.02	32.68	32.03	31.99	32.1	31.19
HAK9	31.25	31.44	31.5	31.56	31.35	30.91	31.11	31.33	29.01	29.02	29.22	28.99	31.33	31.75	31.75	31.51	28.84	28.75	28.72	29.11	30.74	30.72	30.34	30.05
HAK10	33.24	33.16	33.18	33.25	33.19	32.6	32.67	32.2	28.49	28.47	28.41	28.42	33.5	34.59	37.48	33.7	27.85	27.94	27.93	27.99	30.54	30.77	31.16	30.93
HAK11	33.98	34.49	34.06	34.1	33.11	33.09	33.65	33.65	28.48	28.54	28.35	28.67	36.31	34.96	40	33.93	28.01	28.07	27.98	28.05	30.09	30.56	30.76	30.7
HAK12	26.03	25.94	25.98	26.14	26.23	26.22	26.14	26.31	26.51	27.06	26.47	26.08	26.91	27.02	27.16	27.12	25.97	25.86	25.97	26.04	26.39	26.25	26.62	26.44
HAK13	26.82	26.8	26.92	26.81	26.36	26.28	26.21	26.43	27.29	27.3	27.23	27.22	27.55	27.7	27.79	27.67	27.17	27.24	27.47	27.23	26.84	26.5	26.85	26.78
HAK14	35.02	34.6	40	35.24	35.84	40	36.16	35.56	37.85	40	37.32	40	38.35	33.83	37.79	34.53	36.44	40	37.47	37.14	38.4	35.88	40	36.65
HAK15	37.26	38.87	37.15	36.97	37.26	36.82	35.7	40	40	40	40	36.14	40	38.72	40	39.48	40	40	37.29	40	34.24	35.17	35.91	40
ACTIN	22.34	21.72	21.93	21.8	22.04	22.15	22.05	22.04	22.61	22.5	22.41	22.38	22.8	22.78	22.96	22.81	22.16	22.22	22.15	22.15	22.65	22.49	22.53	22.33
	27.165				27.235				28.035				28.0325				27.7				27.77
	26.2425				26.19				27.5625				26.795				26.8275				25.8325
	33.88				33.5425				33.5275				33.895				33.845				34.06
	26.635				27.135				27.445				27.7275				27.29				27.2875
	28.7525				29				29.0725				30.095				29.61				28.7875
	23.8625				23.2725				26.06				23.8675				23.6375				22.8425
	29.4675				29.8225				30.78				30.8125				30.7275				28.985
	31.6725				31.3675				32.575				33.0075				32.715				31.8275
	31.4375				31.175				29.06				31.585				28.855				30.4625
	33.2075				32.665				28.4475				34.8175				27.9275				30.85
	34.1575				33.375				28.51				36.3				28.0275				30.5275
	26.0225				26.225				26.53				27.0525				25.96				26.425
	26.8375				26.32				27.26				27.6775				27.2775				26.7425
	36.215				36.89				38.7925				36.125				37.7625				37.7325
	37.5625				37.445				39.035				39.55				39.3225				36.33
	21.9475				22.07				22.475				22.8375				22.17				22.5
		R	R-1h	R-6h	R-12h	R-24h	R-48h
	HAK1	27.165	27.235	28.035	28.0325	27.7	27.77
	HAK2	26.2425	26.19	27.5625	26.795	26.8275	25.8325
	HAK3	33.88	33.5425	33.5275	33.895	33.845	34.06
	HAK4	26.635	27.135	27.445	27.7275	27.29	27.2875
	HAK5	28.7525	29	29.0725	30.095	29.61	28.7875
	HAK6	23.8625	23.2725	26.06	23.8675	23.6375	22.8425
	HAK7	29.4675	29.8225	30.78	30.8125	30.7275	28.985
	HAK8	31.6725	31.3675	32.575	33.0075	32.715	31.8275
	HAK9	31.4375	31.175	29.06	31.585	28.855	30.4625
	HAK10	33.2075	32.665	28.4475	34.8175	27.9275	30.85
	HAK11	34.1575	33.375	28.51	36.3	28.0275	30.5275
	HAK12	26.0225	26.225	26.53	27.0525	25.96	26.425
	HAK13	26.8375	26.32	27.26	27.6775	27.2775	26.7425
	HAK14	36.215	36.89	38.7925	36.125	37.7625	37.7325
	HAK15	37.5625	37.445	39.035	39.55	39.3225	36.33
	ACTIN	21.9475	22.07	22.475	22.8375	22.17	22.5

## Sheet: Sheet1
1
R	27.32	27.24	27.14	26.96		22.34	21.72	21.93	21.8		4.98	5.52	5.21	5.16		4.98	5.52	5.21	5.16		0	0	0	0		1	1	1	1		1	0
R-1h	27.14	27.24	27.32	27.24		22.04	22.15	22.05	22.04		5.1	5.09	5.27	5.2		4.98	5.52	5.21	5.16		0.12	-0.43	0.06	0.04		0.920188	1.34723	0.959264	0.972655		1.04984	0.199511
R-6h	27.72	27.68	27.8	28.94		22.61	22.5	22.41	22.38		5.11	5.18	5.39	6.56		4.98	5.52	5.21	5.16		0.13	-0.34	0.18	1.4		0.913831	1.26576	0.882703	0.378929		0.860305	0.364911
R-12h	27.95	28.13	28	28.05		22.8	22.78	22.96	22.81		5.15	5.35	5.04	5.24		4.98	5.52	5.21	5.16		0.17	-0.17	-0.17	0.08		0.888843	1.12506	1.12506	0.946058		1.02125	0.122117
R-24h	27.63	27.53	27.82	27.82		22.16	22.22	22.15	22.15		5.47	5.31	5.67	5.67		4.98	5.52	5.21	5.16		0.49	-0.21	0.46	0.51		0.712025	1.15669	0.726986	0.702222		0.82448	0.221706
R-48h	27.62	27.57	27.86	28.03		22.65	22.49	22.53	22.33		4.97	5.08	5.33	5.7		4.98	5.52	5.21	5.16		-0.01	-0.44	0.12	0.54		1.00696	1.3566	0.920188	0.687771		0.99288	0.27741
R	26.45	26.13	26.23	26.16		22.34	21.72	21.93	21.8		4.11	4.41	4.3	4.36		4.11	4.41	4.3	4.36		0	0	0	0		1	1	1	1		1	0
R-1h	26.24	26.11	26.19	26.22		22.04	22.15	22.05	22.04		4.2	3.96	4.14	4.18		4.11	4.41	4.3	4.36		0.09	-0.45	-0.16	-0.18		0.939523	1.36604	1.11729	1.13288		1.13893	0.174974
R-6h	27.57	27.67	27.55	27.46		22.61	22.5	22.41	22.38		4.96	5.17	5.14	5.08		4.11	4.41	4.3	4.36		0.85	0.76	0.84	0.72		0.554785	0.590496	0.558644	0.607097		0.577756	0.0252732
R-12h	26.83	26.85	26.65	26.85		22.8	22.78	22.96	22.81		4.03	4.07	3.69	4.04		4.11	4.41	4.3	4.36		-0.08	-0.34	-0.61	-0.32		1.05702	1.26576	1.52626	1.24833		1.27434	0.192737
R-24h	26.98	26.78	26.81	26.74		22.16	22.22	22.15	22.15		4.82	4.56	4.66	4.59		4.11	4.41	4.3	4.36		0.71	0.15	0.36	0.23		0.61132	0.90125	0.779165	0.852635		0.786093	0.126863
R-48h	25.81	25.81	25.87	25.84		22.65	22.49	22.53	22.33		3.16	3.32	3.34	3.51		4.11	4.41	4.3	4.36		-0.95	-1.09	-0.96	-0.85		1.93187	2.12874	1.94531	1.8025		1.95211	0.13421
R	34.01	33.9	33.98	33.63		22.34	21.72	21.93	21.8		11.67	12.18	12.05	11.83		11.67	12.18	12.05	11.83		0	0	0	0		1	1	1	1		1	0
R-1h	33.78	33.58	33.52	33.29		22.04	22.15	22.05	22.04		11.74	11.43	11.47	11.25		11.67	12.18	12.05	11.83		0.07	-0.75	-0.58	-0.58		0.952638	1.68179	1.49485	1.49485		1.40603	0.314848
R-6h	33.79	33.47	32.76	34.09		22.61	22.5	22.41	22.38		11.18	10.97	10.35	11.71		12.05	11.83	11.67	12.18		-0.87	-0.86	-1.32	-0.47		1.82766	1.81504		1.38511		1.67594	0.251943
R-12h	33.98	33.52	34.35	33.73		22.8	22.78	22.96	22.81		11.18	10.74	11.39	10.92		11.67	12.18	12.05	11.83		-0.49	-1.44	-0.66	-0.91		1.40444		1.58008	1.87905		1.62119	0.239956
R-24h	34.5	33.36	33.74	33.78		22.16	22.22	22.15	22.15		12.34	11.14	11.59	11.63		12.18	11.67	12.05	11.83		0.16	-0.53	-0.46	-0.2		0.895025	1.44393	1.37554	1.1487		1.2158	0.248301
R-48h	33.91	34.28	34.57	33.48		22.65	22.49	22.53	22.33		11.26	11.79	12.04	11.15		11.67	12.18	12.05	11.83		-0.41	-0.39	-0.01	-0.68		1.32869	1.31039	1.00696	1.60214		1.31204	0.243252
R	26.68	26.5	26.65	26.71		22.34	21.72	21.93	21.8		4.34	4.78	4.72	4.91		4.34	4.78	4.72	4.91		0	0	0	0		1	1	1	1		1	0
R-1h	27.23	27.06	27.19	27.06		22.04	22.15	22.05	22.04		5.19	4.91	5.14	5.02		4.34	4.78	4.72	4.91		0.85	0.13	0.42	0.11		0.554785	0.913831	0.747425	0.926588		0.785657	0.174216
R-6h	27.59	27.45	27.64	27.1		22.61	22.5	22.41	22.38		4.98	4.95	5.23	4.72		4.34	4.78	4.72	4.91		0.64	0.17	0.51	-0.19		0.641713	0.888843	0.702222	1.14076		0.843385	0.224424
R-12h	27.78	27.76	27.77	27.6		22.8	22.78	22.96	22.81		4.98	4.98	4.81	4.79		4.34	4.78	4.72	4.91		0.64	0.2	0.09	-0.12		0.641713	0.870551	0.939523	1.08673		0.88463	0.185352
R-24h	27.25	27.36	27.19	27.36		22.16	22.22	22.15	22.15		5.09	5.14	5.04	5.21		4.34	4.78	4.72	4.91		0.75	0.36	0.32	0.3		0.594604	0.779165	0.80107	0.812252		0.746773	0.102373
R-48h	27.28	27.48	27.35	27.04		22.65	22.49	22.53	22.33		4.63	4.99	4.82	4.71		4.34	4.78	4.72	4.91		0.29	0.21	0.1	-0.2		0.817902	0.864537	0.933033	1.1487		0.941043	0.146289
R	28.73	28.56	28.91	28.81		22.34	21.72	21.93	21.8		6.39	6.84	6.98	7.01		6.39	6.84	6.98	7.01		0	0	0	0		1	1	1	1		1	0
R-1h	29.28	28.98	28.83	28.91		22.04	22.15	22.05	22.04		7.24	6.83	6.78	6.87		6.39	6.84	6.98	7.01		0.85	-0.01	-0.2	-0.14		0.554785	1.00696	1.1487	1.10191		0.953086	0.272003
R-6h	28.94	29.13	29.2	29.02		22.61	22.5	22.41	22.38		6.33	6.63	6.79	6.64		6.39	6.84	6.98	7.01		-0.06	-0.21	-0.19	-0.37		1.04247	1.15669	1.14076	1.29235		1.15807	0.10279
R-12h	30.24	29.7	30.43	30.01		22.8	22.78	22.96	22.81		7.44	6.92	7.47	7.2		6.39	6.84	6.98	7.01		1.05	0.08	0.49	0.19		0.482968	0.946058	0.712025	0.876606		0.754414	0.205862
R-24h	29.73	29.71	29.48	29.52		22.16	22.22	22.15	22.15		7.57	7.49	7.33	7.37		6.39	6.84	6.98	7.01		1.18	0.65	0.35	0.36		0.441351	0.63728	0.784584	0.779165		0.660595	0.16129
R-48h	28.9	28.67	28.82	28.76		22.65	22.49	22.53	22.33		6.25	6.18	6.29	6.43		6.39	6.84	6.98	7.01		-0.14	-0.66	-0.69	-0.58		1.10191	1.58008	1.61328	1.49485		1.44753	0.235754
R	23.85	23.84	23.89	23.87		22.34	21.72	21.93	21.8		1.51	2.12	1.96	2.07		1.51	2.12	1.96	2.07		0	0	0	0		1	1	1	1		1	0
R-1h	23.31	23.24	23.18	23.36		22.04	22.15	22.05	22.04		1.27	1.09	1.13	1.32		1.51	2.12	1.96	2.07		-0.24	-1.03	-0.83	-0.75		1.18099	2.04202	1.77769	1.68179		1.67062	0.360215
R-6h	26.02	26.12	26.11	25.99		22.61	22.5	22.41	22.38		3.41	3.62	3.7	3.61		1.51	2.12	1.96	2.07		1.9	1.5	1.74	1.54		0.267943	0.353553	0.29937	0.343885		0.316188	0.0398904
R-12h	23.85	23.83	23.92	23.87		22.8	22.78	22.96	22.81		1.05	1.05	0.96	1.06		1.51	2.12	1.96	2.07		-0.46	-1.07	-1	-1.01		1.37554	2.09943	2	2.01391		1.87222	0.334026
R-24h	23.56	23.87	23.55	23.57		22.16	22.22	22.15	22.15		1.4	1.65	1.4	1.42		1.51	2.12	1.96	2.07		-0.11	-0.47	-0.56	-0.65		1.07923	1.38511	1.47427	1.56917		1.37694	0.212229
R-48h	22.86	22.86	22.8	22.85		22.65	22.49	22.53	22.33		0.21	0.37	0.27	0.52		1.51	2.12	1.96	2.07		-1.3	-1.75	-1.69	-1.55		2.46229	3.36359	3.22657	2.92817		2.99515	0.399051
R	29.58	29.35	29.51	29.43		22.34	21.72	21.93	21.8		7.24	7.63	7.58	7.63		7.24	7.63	7.58	7.63		0	0	0	0		1	1	1	1		1	0
R-1h	29.75	29.84	29.8	29.9		22.04	22.15	22.05	22.04		7.71	7.69	7.75	7.86		7.24	7.63	7.58	7.63		0.47	0.06	0.17	0.23		0.721965	0.959264	0.888843	0.852635		0.855677	0.0995298
R-6h	30.71	30.79	30.84	30.78		22.61	22.5	22.41	22.38		8.1	8.29	8.43	8.4		7.24	7.63	7.58	7.63		0.86	0.66	0.85	0.77		0.550953	0.632878	0.554785	0.586417		0.581258	0.0379057
R-12h	30.89	30.71	30.82	30.83		22.8	22.78	22.96	22.81		8.09	7.93	7.86	8.02		7.24	7.63	7.58	7.63		0.85	0.3	0.28	0.39		0.554785	0.812252	0.823591	0.76313		0.738439	0.125217
R-24h	30.74	30.61	30.83	30.73		22.16	22.22	22.15	22.15		8.58	8.39	8.68	8.58		7.24	7.63	7.58	7.63		1.34	0.76	1.1	0.95		0.395021	0.590496	0.466516	0.517632		0.492416	0.0824869
R-48h	28.86	28.94	28.93	29.21		22.65	22.49	22.53	22.33		6.21	6.45	6.4	6.88		7.24	7.63	7.58	7.63		-1.03	-1.18	-1.18	-0.75		2.04202	2.26577	2.26577	1.68179		2.06384	0.275672
R	30.9	31.5	31.89	32.4		22.34	21.72	21.93	21.8		8.56	9.78	9.96	10.6		8.56	9.78	9.96	10.6		0	0	0	0		1	1	1	1		1	0
R-1h	31.36	30.81	31.69	31.61		22.04	22.15	22.05	22.04		9.32	8.66	9.64	9.57		9.78	8.56	10.6	9.96		-0.46	0.1	-0.96	-0.39		1.37554	0.933033		1.31039		1.20632	0.238907
R-6h	32.85	32.65	32.4	32.4		22.61	22.5	22.41	22.38		10.24	10.15	9.99	10.02		8.56	9.78	9.96	10.6		1.68	0.37	0.03	-0.58		0.312083	0.773782	0.97942	1.49485		0.890034	0.490351
R-12h	32.89	33	32.99	33.15		22.8	22.78	22.96	22.81		10.09	10.22	10.03	10.34		8.56	9.78	9.96	10.6		1.53	0.44	0.07	-0.26		0.346277	0.737135	0.952638	1.19748		0.808382	0.360935
R-24h	32.55	32.61	33.02	32.68		22.16	22.22	22.15	22.15		10.39	10.39	10.87	10.53		8.56	9.78	9.96	10.6		1.83	0.61	0.91	-0.07		0.281265	0.655197	0.532185	1.04972		0.629591	0.320406
R-48h	32.03	31.99	32.1	31.19		22.65	22.49	22.53	22.33		9.38	9.5	9.57	8.86		9.96	9.78	10.6	10.6		-0.58	-0.28	-1.03	-1.74		1.49485	1.21419	2.04202			1.58369	0.421005
R	31.25	31.44	31.5	31.56		22.34	21.72	21.93	21.8		8.91	9.72	9.57	9.76		8.91	9.72	9.57	9.76		0	0	0	0		1	1	1	1		1	0
R-1h	31.35	30.91	31.11	31.33		22.04	22.15	22.05	22.04		9.31	8.76	9.06	9.29		8.91	9.72	9.57	9.76		0.4	-0.96	-0.51	-0.47		0.757858	1.94531	1.42405	1.38511		1.37808	0.486
R-6h	29.01	29.02	29.22	28.99		22.61	22.5	22.41	22.38		6.4	6.52	6.81	6.61		8.91	9.72	9.57	9.76		-2.51	-3.2	-2.76	-3.15		5.6962	9.18959	6.77396	8.87656		7.63408	1.67914
R-12h	31.33	31.75	31.75	31.51		22.8	22.78	22.96	22.81		8.53	8.97	8.79	8.7		8.91	9.72	9.57	9.76		-0.38	-0.75	-0.78	-1.06		1.30134	1.68179	1.71713	2.08493		1.6963	0.320245
R-24h	28.84	28.75	28.72	29.11		22.16	22.22	22.15	22.15		6.68	6.53	6.57	6.96		8.91	9.72	9.57	9.76		-2.23	-3.19	-3	-2.8		4.69134	9.12611	8	6.9644		7.19546	1.88845
R-48h	30.74	30.72	30.34	30.05		22.65	22.49	22.53	22.33		8.09	8.23	7.81	7.72		8.91	9.72	9.57	9.76		-0.82	-1.49	-1.76	-2.04		1.76541	2.80889	3.38698	4.11246		3.01843	0.991076
R	33.24	33.16	33.18	33.25		22.34	21.72	21.93	21.8		10.9	11.44	11.25	11.45		10.9	11.44	11.25	11.45		0	0	0	0		1	1	1	1		1	0
R-1h	33.19	32.6	32.67	32.2		22.04	22.15	22.05	22.04		11.15	10.45	10.62	10.16		10.9	11.44	11.25	11.45		0.25	-0.99	-0.63	-1.29		0.840896	1.98618	1.54756	2.44528		1.70498	0.682774
R-6h	28.49	28.47	28.41	28.42		22.61	22.5	22.41	22.38		5.88	5.97	6	6.04		11.25	11.44	11.25	11.45		-5.37	-5.47	-5.25	-5.41		41.3553	44.3235		42.5179		42.7322	1.49567
R-12h	33.5	34.59	33.7	33.7		22.8	22.78	22.96	22.81		10.7	11.81	10.74	10.89		10.9	11.44	11.25	11.45		-0.2	0.37	-0.51	-0.56		1.1487		1.42405	1.47427		1.34901	0.175279
R-24h	27.85	27.94	27.93	27.99		22.16	22.22	22.15	22.15		5.69	5.72	5.78	5.84		11.45	11.44	11.45	11.25		-5.76	-5.72	-5.67	-5.41		54.1917	52.7098	50.9143			52.6053	1.64118
R-48h	30.54	30.77	31.16	30.93		22.65	22.49	22.53	22.33		7.89	8.28	8.63	8.6		10.9	11.44	11.25	11.45		-3.01	-3.16	-2.62	-2.85		8.05564	8.9383		7.21		8.06798	0.864213
R	33.98	34.49	34.06	34.1		22.34	21.72	21.93	21.8		11.64	12.77	12.13	12.3		11.64	12.77	12.13	12.3		0	0	0	0		1	1	1	1		1	0
R-1h	33.11	33.09	33.65	33.65		22.04	22.15	22.05	22.04		11.07	10.94	11.6	11.61		11.64	12.77	12.13	12.3		-0.57	-1.83	-0.53	-0.69		1.48452		1.44393	1.61328		1.51391	0.0884194
R-6h	28.48	28.54	28.35	28.67		22.61	22.5	22.41	22.38		5.87	6.04	5.94	6.29		12.3	12.77	12.3	12.13		-6.43	-6.73	-6.36	-5.84		86.2229	106.153	82.1393			91.505	12.8487
R-12h	36.31	34.96	40	33.93		22.8	22.78	22.96	22.81		13.51	12.18	17.04	11.12		11.64	12.77	12.13	12.3		1.87	-0.59	4.91	-1.18		0.273573	1.50525	0.0332616	2.26577		1.01946	1.0517
R-24h	28.01	28.07	27.98	28.05		22.16	22.22	22.15	22.15		5.85	5.85	5.83	5.9		12.3	12.77	12.13	12.3		-6.45	-6.92	-6.3	-6.4		87.4266		78.7932	84.4485		83.5561	4.3853
R-48h	30.09	30.56	30.76	30.7		22.65	22.49	22.53	22.33		7.44	8.07	8.23	8.37		11.64	12.77	12.13	12.3		-4.2	-4.7	-3.9	-3.93		18.3792	25.9921	14.9285	15.2422		18.6355	5.1459
R	26.03	25.94	25.98	26.14		22.34	21.72	21.93	21.8		3.69	4.22	4.05	4.34		3.69	4.22	4.05	4.34		0	0	0	0		1	1	1	1		1	0
R-1h	26.23	26.22	26.14	26.31		22.04	22.15	22.05	22.04		4.19	4.07	4.09	4.27		3.69	4.22	4.05	4.34		0.5	-0.15	0.04	-0.07		0.707107	1.10957	0.972655	1.04972		0.959762	0.177515
R-6h	26.51	27.06	26.47	26.08		22.61	22.5	22.41	22.38		3.9	4.56	4.06	3.7		3.69	4.22	4.05	4.34		0.21	0.34	0.01	-0.64		0.864537	0.790041	0.993092	1.55833		1.0515	0.348139
R-12h	26.91	27.02	27.16	27.12		22.8	22.78	22.96	22.81		4.11	4.24	4.2	4.31		3.69	4.22	4.05	4.34		0.42	0.02	0.15	-0.03		0.747425	0.986233	0.90125	1.02101		0.91398	0.1219
R-24h	25.97	25.86	25.97	26.04		22.16	22.22	22.15	22.15		3.81	3.64	3.82	3.89		3.69	4.22	4.05	4.34		0.12	-0.58	-0.23	-0.45		0.920188	1.49485	1.17283	1.36604		1.23848	0.250077
R-48h	26.39	26.25	26.62	26.44		22.65	22.49	22.53	22.33		3.74	3.76	4.09	4.11		3.69	4.22	4.05	4.34		0.05	-0.46	0.04	-0.23		0.965936	1.37554	0.972655	1.17283		1.12174	0.194531
R	26.82	26.8	26.92	26.81		22.34	21.72	21.93	21.8		4.48	5.08	4.99	5.01		4.48	5.08	4.99	5.01		0	0	0	0		1	1	1	1		1	0
R-1h	26.36	26.28	26.21	26.43		22.04	22.15	22.05	22.04		4.32	4.13	4.16	4.39		4.48	5.08	4.99	5.01		-0.16	-0.95	-0.83	-0.62		1.11729	1.93187	1.77769	1.53688		1.59093	0.355143
R-6h	27.29	27.3	27.23	27.22		22.61	22.5	22.41	22.38		4.68	4.8	4.82	4.84		4.48	5.08	4.99	5.01		0.2	-0.28	-0.17	-0.17		0.870551	1.21419	1.12506	1.12506		1.08372	0.148192
R-12h	27.55	27.7	27.79	27.67		22.8	22.78	22.96	22.81		4.75	4.92	4.83	4.86		4.48	5.08	4.99	5.01		0.27	-0.16	-0.16	-0.15		0.82932	1.11729	1.11729	1.10957		1.04337	0.142744
R-24h	27.17	27.24	27.47	27.23		22.16	22.22	22.15	22.15		5.01	5.02	5.32	5.08		4.48	5.08	4.99	5.01		0.53	-0.06	0.33	0.07		0.692555	1.04247	0.795536	0.952638		0.870799	0.156634
R-48h	26.84	26.5	26.85	26.78		22.65	22.49	22.53	22.33		4.19	4.01	4.32	4.45		4.48	5.08	4.99	5.01		-0.29	-1.07	-0.67	-0.56		1.22264	2.09943	1.59107	1.47427		1.59685	0.368638
R	35.02	34.6	34.6	35.24		22.34	21.72	21.93	21.8		12.68	12.88	12.67	13.44		12.68	12.88	12.67	13.44		0	0	0	0		1	1	1	1		1	0
R-1h	35.84	40	36.16	35.56		22.04	22.15	22.05	22.04		13.8	17.85	14.11	13.52		12.68	12.88	12.67	13.44		1.12	4.97	1.44	0.08		0.460094	0.0319066	0.368567	0.946058		0.451656	0.377535
R-6h	37.85	40	37.32	40		22.61	22.5	22.41	22.38		15.24	17.5	14.91	17.62		12.68	12.88	12.67	13.44		2.56	4.62	2.24	4.18		0.169576	0.0406669	0.211686	0.0551689		0.119274	0.0843777
R-12h	38.35	33.83	37.79	34.53		22.8	22.78	22.96	22.81		15.55	11.05	14.83	11.72		12.68	12.88	12.67	13.44		2.87	-1.83	2.16	-1.72		0.136787	3.55537	0.223756	3.29436		1.80257	1.87663
R-24h	36.44	40	37.47	37.14		22.16	22.22	22.15	22.15		14.28	17.78	15.32	14.99		12.68	12.88	12.67	13.44		1.6	4.9	2.65	1.55		0.329877	0.0334929	0.15932	0.34151		0.21605	0.14747
R-48h	38.4	35.88	40	36.65		22.65	22.49	22.53	22.33		15.75	13.39	17.47	14.32		12.68	12.88	12.67	13.44		3.07	0.51	4.8	0.88		0.11908	0.702222	0.0358968	0.543367		0.350142	0.323232
R	37.26	38.87	37.15	36.97		22.34	21.72	21.93	21.8		14.92	17.15	15.22	15.17		14.92	17.15	15.22	15.17		0	0	0	0		1	1	1	1		1	0
R-1h	37.26	36.82	35.7	35.7		22.04	22.15	22.05	22.04		15.22	14.67	13.65	13.66		14.92	17.15	15.22	15.17		0.3	-2.48	-1.57	-1.51		0.812252	5.57897	2.96905	2.8481		3.05209	1.95367
R-6h	40	40	40	36.14		22.61	22.5	22.41	22.38		17.39	17.5	17.59	13.76		14.92	17.15	15.22	15.17		2.47	0.35	2.37	-1.41		0.180491	0.784584	0.193446	2.65737		0.953973	1.17003
R-12h	40	38.72	40	39.48		22.8	22.78	22.96	22.81		17.2	15.94	17.04	16.67		14.92	17.15	15.22	15.17		2.28	-1.21	1.82	1.5		0.205898	2.31338	0.283221	0.353553		0.789012	1.01803
R-24h	40	40	37.29	40		22.16	22.22	22.15	22.15		17.84	17.78	15.14	17.85		14.92	17.15	15.22	15.17		2.92	0.63	-0.08	2.68		0.132127	0.646176	1.05702	0.156041		0.497841	0.441685
R-48h	34.24	35.17	35.91	35.17		22.65	22.49	22.53	22.33		11.59	12.68	13.38	12.84		14.92	15.22	15.22	15.17		-3.33	-2.54	-1.84	-2.33			5.81589	3.5801	5.02805		4.80801	1.13402
R	26.49	26.59	26.27	26.45		21.92	22.2	21.93	21.88		4.57	4.39	4.34	4.57		4.57	4.39	4.34	4.57		0	0	0	0		1	1	1	1		1	0
R-1h	26.69	26.69	26.67	26.77		22.38	22.34	22.13	22.05		4.31	4.35	4.54	4.72		4.57	4.39	4.34	4.57		-0.26	-0.04	0.2	0.15		1.19748	1.02811	0.870551	0.90125		0.999348	0.148655
R-6h	27.5	27.62	27.66	27.75		22.34	22.85	22.5	22.57		5.16	4.77	5.16	5.18		4.57	4.39	4.34	4.57		0.59	0.38	0.82	0.61		0.664343	0.768438	0.566442	0.655197		0.663605	0.0826676
R-12h	27.65	27.58	27.56	27.52		22.93	23.04	22.92	22.94		4.72	4.54	4.64	4.58		4.57	4.39	4.34	4.57		0.15	0.15	0.3	0.01		0.90125	0.90125	0.812252	0.993092		0.901961	0.0738322
R-24h	26.91	27.01	27.01	27.23		22.49	22.24	22.45	22.44		4.42	4.77	4.56	4.79		4.57	4.39	4.34	4.57		-0.15	0.38	0.22	0.22		1.10957	0.768438	0.858565	0.858565		0.898784	0.146806
R-48h	27.06	27.06	27.2	27.23		22.97	22.8	22.74	22.46		4.09	4.26	4.46	4.77		4.57	4.39	4.34	4.57		-0.48	-0.13	0.12	0.2		1.39474	1.09429	0.920188	0.870551		1.06994	0.236835
R	38.51	38.42	38.6	38.45		21.92	22.2	21.93	21.88		16.59	16.22	16.67	16.57		16.59	16.22	16.67	16.57		0	0	0	0		1	1	1	1		1	0
R-1h	38.54	37.87	38.06	38.12		22.38	22.34	22.13	22.05		16.16	15.53	15.93	16.07		16.59	16.22	16.67	16.57		-0.43	-0.69	-0.74	-0.5		1.34723	1.61328	1.67018	1.41421		1.51123	0.154904
R-6h	38.45	38.41	38.4	38.44		22.34	22.85	22.5	22.57		16.11	15.56	15.9	15.87		16.59	16.22	16.67	16.57		-0.48	-0.66	-0.77	-0.7		1.39474	1.58008	1.70527	1.6245		1.57615	0.131572
R-12h	37.26	37.23	37.89	37.54		22.93	23.04	22.92	22.94		14.33	14.19	14.97	14.6		16.59	16.22	16.57	16.67		-2.26	-2.03	-1.6	-2.07		4.78991	4.08405		4.19887		4.35761	0.378763
R-24h	37.05	37.92	37.51	37.21		22.49	22.24	22.45	22.44		14.56	15.68	15.06	14.77		16.59	16.22	16.67	16.57		-2.03	-0.54	-1.61	-1.8		4.08405		3.05252	3.4822		3.53959	0.518154
R-48h	36.89	36.94	37.06	36.59		22.97	22.8	22.74	22.46		13.92	14.14	14.32	14.13		16.22	16.59	16.67	16.57		-2.3	-2.45	-2.35	-2.44		4.92458	5.46416	5.09824	5.42642		5.22835	0.260796
R	38.26	38.19	38.58	38.41		21.92	22.2	21.93	21.88		16.34	15.99	16.65	16.53		16.34	15.99	16.65	16.53		0	0	0	0		1	1	1	1		1	0
R-1h	37.76	36.76	36.69	36.77		22.38	22.34	22.13	22.05		15.38	14.42	14.56	14.72		16.65	15.99	16.34	16.53		-1.27	-1.57	-1.78	-1.81		2.41162	2.96905	3.43426	3.50642		3.08034	0.505432
R-6h	38.56	39.4	39.17	39.11		22.34	22.85	22.5	22.57		16.22	16.55	16.67	16.54		15.99	16.65	16.65	16.53		0.23	-0.1	0.02	0.01		0.852635	1.07177	0.986233	0.993092		0.975933	0.0908999
R-12h	38.39	37.5	36.8	37.12		22.93	23.04	22.92	22.94		15.46	14.46	13.88	14.18		16.65	16.34	15.99	15.99		-1.19	-1.88	-2.11	-1.81		2.28153	3.68075	4.31691	3.50642		3.4464	0.851125
R-24h	38.97	38.67	39.61	38.94		22.49	22.24	22.45	22.44		16.48	16.43	17.16	16.5		16.34	15.99	16.65	16.53		0.14	0.44	0.51	-0.03		0.907519	0.737135	0.702222	1.02101		0.841972	0.149301
R-48h	37.34	37.65	37.26	37.23		22.97	22.8	22.74	22.46		14.37	14.85	14.52	14.77		16.34	16.65	15.99	16.53		-1.97	-1.8	-1.47	-1.76		3.91768	3.4822	2.77022	3.38698		3.38927	0.472964
R	27.15	27.11	27.14	27.26		21.92	22.2	21.93	21.88		5.23	4.91	5.21	5.38		5.23	4.91	5.21	5.38		0	0	0	0		1	1	1	1		1	0
R-1h	27.24	27.23	26.99	27.38		22.38	22.34	22.13	22.05		4.86	4.89	4.86	5.33		5.23	4.91	5.21	5.38		-0.37	-0.02	-0.35	-0.05		1.29235	1.01396	1.27456	1.03526		1.15403	0.149873
R-6h	27.63	27.1	27.52	27.13		22.34	22.85	22.5	22.57		5.29	4.25	5.02	4.56		5.23	4.91	5.21	5.38		0.06	-0.66	-0.19	-0.82		0.959264	1.58008	1.14076	1.76541		1.36138	0.374805
R-12h	27.98	27.85	27.75	28.25		22.93	23.04	22.92	22.94		5.05	4.81	4.83	5.31		5.23	4.91	5.21	5.38		-0.18	-0.1	-0.38	-0.07		1.13288	1.07177	1.30134	1.04972		1.13893	0.113847
R-24h	27.11	27.71	27.7	27.47		22.49	22.24	22.45	22.44		4.62	5.47	5.25	5.03		5.23	4.91	5.21	5.38		-0.61	0.56	0.04	-0.35		1.52626	0.678302	0.972655	1.27456		1.11294	0.36767
R-48h	27.55	27.47	27.47	27.86		22.97	22.8	22.74	22.46		4.58	4.67	4.73	5.4		5.23	4.91	5.21	5.38		-0.65	-0.24	-0.48	0.02		1.56917	1.18099	1.39474	0.986233		1.28278	0.253545
R	33.92	33.72	33.96	33.72		21.92	22.2	21.93	21.88		12	11.52	12.03	11.84		12	11.52	12.03	11.84		0	0	0	0		1	1	1	1		1	0
R-1h	35.22	34.82	34.93	35.02		22.38	22.34	22.13	22.05		12.84	12.48	12.8	12.97		12	11.52	12.03	11.84		0.84	0.96	0.77	1.13		0.558644	0.514057	0.586417	0.456916		0.529008	0.0565536
R-6h	36.34	37	36.89	36.99		22.34	22.85	22.5	22.57		14	14.15	14.39	14.42		12	11.52	12.03	11.84		2	2.63	2.36	2.58		0.25	0.161544	0.194791	0.167241		0.193394	0.0404334
R-12h	35.81	36.74	36.21	36.37		22.93	23.04	22.92	22.94		12.88	13.7	13.29	13.43		12	11.52	12.03	11.84		0.88	2.18	1.26	1.59		0.543367	0.220676	0.417544	0.332171		0.37844	0.136334
R-24h	34.41	35.36	35.54	35.32		22.49	22.24	22.45	22.44		11.92	13.12	13.09	12.88		12	11.52	12.03	11.84		-0.08	1.6	1.06	1.04		1.05702	0.329877	0.479632	0.486327		0.588214	0.320773
R-48h	37.42	36.72	37.05	37.14		22.97	22.8	22.74	22.46		14.45	13.92	14.31	14.68		12	11.52	12.03	11.84		2.45	2.4	2.28	2.84		0.183011	0.189465	0.205898	0.139661		0.179508	0.0282584

## Sheet: Sheet5
						R	1	1	1	1		1	0
						R-1h	0.920188	1.34723	0.959264	0.972655		1.04984	0.199511	HAK1
						R-6h	0.913831	1.26576	0.882703	0.378929		0.860305	0.364911
						R-12h	0.888843	1.12506	1.12506	0.946058		1.02125	0.122117
						R-24h	0.712025	1.15669	0.726986	0.702222		0.82448	0.221706
						R-48h	1.00696	1.3566	0.920188	0.687771		0.99288	0.27741
						R	1	1	1	1		1	0
						R-1h	0.939523	1.36604	1.11729	1.13288		1.13893	0.174974	HAK2
						R-6h	0.554785	0.590496	0.558644	0.607097		0.577756	0.0252732
						R-12h	1.05702	1.26576	1.52626	1.24833		1.27434	0.192737
						R-24h	0.61132	0.90125	0.779165	0.852635		0.786093	0.126863
						R-48h	1.93187	2.12874	1.94531	1.8025		1.95211	0.13421
						R	1	1	1	1		1	0
						R-1h	0.952638	1.68179	1.49485	1.49485		1.40603	0.314848	HAK3
						R-6h	1.82766	1.81504		1.38511		1.67594	0.251943
						R-12h	1.40444		1.58008	1.87905		1.62119	0.239956
						R-24h	0.895025	1.44393	1.37554	1.1487		1.2158	0.248301
						R-48h	1.32869	1.31039	1.00696	1.60214		1.31204	0.243252
						R	1	1	1	1		1	0
						R-1h	0.554785	0.913831	0.747425	0.926588		0.785657	0.174216	HAK4
						R-6h	0.641713	0.888843	0.702222	1.14076		0.843385	0.224424
						R-12h	0.641713	0.870551	0.939523	1.08673		0.88463	0.185352
						R-24h	0.594604	0.779165	0.80107	0.812252		0.746773	0.102373
						R-48h	0.817902	0.864537	0.933033	1.1487		0.941043	0.146289
						R	1	1	1	1		1	0
						R-1h	0.554785	1.00696	1.1487	1.10191		0.953086	0.272003	HAK5
						R-6h	1.04247	1.15669	1.14076	1.29235		1.15807	0.10279
						R-12h	0.482968	0.946058	0.712025	0.876606		0.754414	0.205862
						R-24h	0.441351	0.63728	0.784584	0.779165		0.660595	0.16129
						R-48h	1.10191	1.58008	1.61328	1.49485		1.44753	0.235754
						R	1	1	1	1		1	0
						R-1h	1.18099	2.04202	1.77769	1.68179		1.67062	0.360215	HAK6
						R-6h	0.267943	0.353553	0.29937	0.343885		0.316188	0.0398904
						R-12h	1.37554	2.09943	2	2.01391		1.87222	0.334026
						R-24h	1.07923	1.38511	1.47427	1.56917		1.37694	0.212229
						R-48h	2.46229	3.36359	3.22657	2.92817		2.99515	0.399051
						R	1	1	1	1		1	0
						R-1h	0.721965	0.959264	0.888843	0.852635		0.855677	0.0995298	HAK7
						R-6h	0.550953	0.632878	0.554785	0.586417		0.581258	0.0379057
						R-12h	0.554785	0.812252	0.823591	0.76313		0.738439	0.125217
						R-24h	0.395021	0.590496	0.466516	0.517632		0.492416	0.0824869
						R-48h	2.04202	2.26577	2.26577	1.68179		2.06384	0.275672
						R	1	1	1	1		1	0
						R-1h	1.37554	0.933033		1.31039		1.20632	0.238907	HAK8
						R-6h	0.312083	0.773782	0.97942	1.49485		0.890034	0.490351
						R-12h	0.346277	0.737135	0.952638	1.19748		0.808382	0.360935
						R-24h	0.281265	0.655197	0.532185	1.04972		0.629591	0.320406
						R-48h	1.49485	1.21419	2.04202			1.58369	0.421005
						R	1	1	1	1		1	0
						R-1h	0.757858	1.94531	1.42405	1.38511		1.37808	0.486	HAK9
						R-6h	5.6962	9.18959	6.77396	8.87656		7.63408	1.67914
						R-12h	1.30134	1.68179	1.71713	2.08493		1.6963	0.320245
						R-24h	4.69134	9.12611	8	6.9644		7.19546	1.88845
						R-48h	1.76541	2.80889	3.38698	4.11246		3.01843	0.991076
						R	1	1	1	1		1	0
						R-1h	0.840896	1.98618	1.54756	2.44528		1.70498	0.682774	HAK10
						R-6h	41.3553	44.3235		42.5179		42.7322	1.49567
						R-12h	1.1487		1.42405	1.47427		1.34901	0.175279
						R-24h	54.1917	52.7098	50.9143			52.6053	1.64118
						R-48h	8.05564	8.9383		7.21		8.06798	0.864213
						R	1	1	1	1		1	0
						R-1h	1.48452		1.44393	1.61328		1.51391	0.0884194	HAK11
						R-6h	86.2229	106.153	82.1393			91.505	12.8487
						R-12h	0.273573	1.50525	0.0332616	2.26577		1.01946	1.0517
						R-24h	87.4266		78.7932	84.4485		83.5561	4.3853
						R-48h	18.3792	25.9921	14.9285	15.2422		18.6355	5.1459
						R	1	1	1	1		1	0
						R-1h	0.707107	1.10957	0.972655	1.04972		0.959762	0.177515	HAK12
						R-6h	0.864537	0.790041	0.993092	1.55833		1.0515	0.348139
						R-12h	0.747425	0.986233	0.90125	1.02101		0.91398	0.1219
						R-24h	0.920188	1.49485	1.17283	1.36604		1.23848	0.250077
						R-48h	0.965936	1.37554	0.972655	1.17283		1.12174	0.194531
						R	1	1	1	1		1	0
						R-1h	1.11729	1.93187	1.77769	1.53688		1.59093	0.355143	HAK13
						R-6h	0.870551	1.21419	1.12506	1.12506		1.08372	0.148192
						R-12h	0.82932	1.11729	1.11729	1.10957		1.04337	0.142744
						R-24h	0.692555	1.04247	0.795536	0.952638		0.870799	0.156634
						R-48h	1.22264	2.09943	1.59107	1.47427		1.59685	0.368638
						R	1	1	1	1		1	0
						R-1h	0.460094	0.0319066	0.368567	0.946058		0.451656	0.377535	HAK14
						R-6h	0.169576	0.0406669	0.211686	0.0551689		0.119274	0.0843777
						R-12h	0.136787	3.55537	0.223756	3.29436		1.80257	1.87663
						R-24h	0.329877	0.0334929	0.15932	0.34151		0.21605	0.14747
						R-48h	0.11908	0.702222	0.0358968	0.543367		0.350142	0.323232
						R	1	1	1	1		1	0
						R-1h		5.57897	2.96905	2.8481		3.05209	1.95367	HAK15
						R-6h	0.180491	0.784584	0.193446	2.65737		0.953973	1.17003
						R-12h	0.205898	2.31338	0.283221	0.353553		0.789012	1.01803
						R-24h	0.132127	0.646176	1.05702	0.156041		0.497841	0.441685
						R-48h		5.81589	3.5801	5.02805		4.80801	1.13402
						R	1	1	1	1		1	0
						R-1h	1.19748	1.02811	0.870551	0.90125		0.999348	0.148655	HAK16
						R-6h	0.664343	0.768438	0.566442	0.655197		0.663605	0.0826676
						R-12h	0.90125	0.90125	0.812252	0.993092		0.901961	0.0738322
						R-24h	1.10957	0.768438	0.858565	0.858565		0.898784	0.146806
						R-48h	1.39474	1.09429	0.920188	0.870551		1.06994	0.236835
						R	1	1	1	1		1	0
						R-1h	1.34723	1.61328	1.67018	1.41421		1.51123	0.154904	HAK17
						R-6h	1.39474	1.58008	1.70527	1.6245		1.57615	0.131572
						R-12h	4.78991	4.08405		4.19887		4.35761	0.378763
						R-24h	4.08405		3.05252	3.4822		3.53959	0.518154
						R-48h	4.92458	5.46416	5.09824	5.42642		5.22835	0.260796
						R	1	1	1	1		1	0
						R-1h	2.41162	2.96905	3.43426	3.50642		3.08034	0.505432	HAK18
						R-6h	0.852635	1.07177	0.986233	0.993092		0.975933	0.0908999
						R-12h	2.28153	3.68075	4.31691	3.50642		3.4464	0.851125
						R-24h	0.907519	0.737135	0.702222	1.02101		0.841972	0.149301
						R-48h	3.91768	3.4822	2.77022	3.38698		3.38927	0.472964
						R	1	1	1	1		1	0
						R-1h	1.29235	1.01396	1.27456	1.03526		1.15403	0.149873	HAK19
						R-6h	0.959264	1.58008	1.14076	1.76541		1.36138	0.374805
						R-12h	1.13288	1.07177	1.30134	1.04972		1.13893	0.113847
						R-24h	1.52626	0.678302	0.972655	1.27456		1.11294	0.36767
						R-48h	1.56917	1.18099	1.39474	0.986233		1.28278	0.253545
						R	1	1	1	1		1	0
						R-1h	0.558644	0.514057	0.586417	0.456916		0.529008	0.0565536	HAK20
						R-6h	0.25	0.161544	0.194791	0.167241		0.193394	0.0404334
						R-12h	0.543367	0.220676	0.417544	0.332171		0.37844	0.136334
						R-24h	1.05702	0.329877	0.479632	0.486327		0.588214	0.320773
						R-48h	0.183011	0.189465	0.205898	0.139661		0.179508	0.0282584

## Sheet: Sheet3
			time（h）
		R-0h	0	1	0.112346
		R-1h	1	1.37062	0.360215	HAK6
		R-6h	6	1.31619	0.0398904
		R-12h	12	1.67222	0.334026
		R-24h	24	1.87694	0.212229
		R-48h	48	2.99515	0.399051
		R-0h	0	1	0.213574
		R-1h	1	0.955677	0.0995298	HAK7
		R-6h	6	0.981258	0.0379057
		R-12h	12	1.13844	0.125217
		R-24h	24	1.29242	0.0824869
		R-48h	48	2.06384	0.275672
		R-0h	0	1	0.14595
		R-1h	1	1.37808	0.486	HAK9
		R-6h	6	7.63408	1.67914
		R-12h	12	7.6963	0.320245
		R-24h	24	7.19546	1.88845
		R-48h	48	3.01843	0.991076
		R-0h	0	1	0.224759
		R-1h	1	1.70498	0.682774	HAK10
		R-6h	6	42.7322	1.49567
		R-12h	12	49.349	0.175279
		R-24h	24	52.6053	1.64118
		R-48h	48	8.06798	0.864213
		R-0h	0	1	0.128575
		R-1h	1	1.51391	0.0884194	HAK11
		R-6h	6	91.505	12.8487
		R-12h	12	88.0195	1.0517
		R-24h	24	83.5561	4.3853
		R-48h	48	18.6355	5.1459
		R-0h	0	1	0.138698
		R-1h	1	3.05209	0.753674	HAK15
		R-6h	6	3.95397	0.670034
		R-12h	12	3.78901	1.01803
		R-24h	24	3.49784	0.441685
		R-48h	48	4.80801	1.13402
		R-0h	0	1	0.185732
		R-1h	1	1.51123	0.154904	HAK17
		R-6h	6	1.57615	0.131572
		R-12h	12	4.35761	0.378763
		R-24h	24	4.53959	0.518154
		R-48h	48	5.22835	0.260796
		R-0h	0	1	0.157678
		R-1h	1	3.08034	0.505432	HAK18
		R-6h	6	3.37593	0.0908999
		R-12h	12	3.4464	0.351125
		R-24h	24	3.84197	0.149301
		R-48h	48	3.38927	0.472964
