# Supplementary material for: Genome-wide identification, characterization and expression analysis of HAK genes and decoding their role in responding to potassium deficiency and abiotic stress in Medicago truncatula
Source: PeerJ. 2022 Sep 22;10:e14034. doi: 10.7717/peerj.14034 (PMC9509677; doi:10.7717/peerj.14034)
Supplement: Supplemental Information 2 [file peerj-10-14034-s002.xlsx]

## Sheet: Table-S1
Table S1. HAK amino acid sequences of Medicago truncatula, Arabidopsis thaliana and Oryza sativa.
Gene name	Gene ID	Species	Amino acid sequences
MtHAK1	Medtr2g008820.1	Medicago truncatula	MAEESGDEINGGFSMDSTESRWVFHEDDEDEDASDIEEYDTDLRFRGRVNVHDSEEEEDEDNAEQKLIRTGPRIDSFDVEALDVPGAHRNDYEDIGVGRKIVLAFQTLGVVFGDVGTSPLYTFSVMFRKAPINDNEDILGALSLVLYTLILIPLVKYILIVLWANDNGEGGTFALYSLICRHAKVSLLPNQLPSDARISSFRLKVPSPELERSLKIKERLESSLTLKKALLIFVLAGTSMVIANGVVTPAMSVLSSVGGLKVGIDSIKQDEVVMISVACLIVLFSVQKYGTSKVGLAVGPALFIWFCSLAGIGIYNLLKYDRSVLRAFNPIHIYYFFKRNSTKAWYSLGGCLLCATGSEAMFADLCYFSVRSVQLTFVFLVLPCLLLGYLGQAAYLMEN…
MtHAK2	Medtr2g438150.1	Medicago truncatula	MASPLEIDEENDNKGSMWDLEQKLDQPMDAEAGRLRNMYREKKFSALLLLRLAYQSLGVVYGDLGTSPLYVFYNTFPRGVDDPEKVIGALSLIIYSLTLVPLLKYVFIVLRANDNGQGGTLALYSLLCRHANIKIIPNQHRTDEELTTYSRTTFHEKSFAAKTQRWLEEQKFIKSTILILVLVGTCMVIGDGILTPAISVLSAAGGIKVNKPEVDSGVVVLVAVVILVGLFSIQRYGTDRVGWLFAPIVLLWFLLIGGIGIYNLWRFGGSVLRAFSPLYVYRYLRDGRKDSWLSLGGILLSITGTEALFADLANFPVSSVQIAFTLVVFPCLLLAYSGQAAYLVNNLHHSQDVFYRSIPEKIYWPVFVIATLAAVVASQATITATFSIIKQALAHGCFP…
MtHAK3	Medtr2g438160.1	Medicago truncatula	MASPLEIDEENDNKGSMWDLQQKFDQPMDAEAGRLKNMYREKKFSALLLLQLAYQSLGVVYGDLGTSPLYVFYNTFPYGVDDSEKVIGALSLIIYSLTLVPLLKYVFIVLRANDNGQGGTLALYSLLCRHANIKIIPNQHRTDEKLTTYSRTTFQEKSFAAKTQRWLEQHKFIKSTILILVLVGTCMVIGDGILAPAISVLSAAGGIKVNKPEVDSGVVVLVAVVILVGLFSIQRYGTDRVGWLFAPIVLLWFLLIGGIGIYNLWRFGGSVLRAFSPLYVYRYLRDGHKDSWLSLGGILLSITGTEALFADLANFPVSSVQIAFTLVVFPCLLLAYSGQAAYLVNNLHHSQDVFYRCIPEKIYWPVFVIATLAAVVASQATITATFSVIKQALAHGCFP…
MtHAK4	Medtr3g094090.1	Medicago truncatula	MDLEPGRKCWDTSKRGDWKTILLLAYQSLGVVYGDLSISPLYVFTSTFAEDIEHSETNEEIYGTLSFVFWTLTLIPLFKYVFVVLRADDNGEGGTFALYSLICRHAKVSLLPNRQHADEALSSYKMEEPPEKEYSKFKMLLEKYKTLHTALLIVVLLGTCMVIGDGVLTPAISVFSAVSGLEVSIMSKKHHQYAVIPITCFILVCLFALQHYGTHKVGFFFAPIVLTWLLCISTLGVYNIFKWNPHVYKALSPYYMFKFLKKTRISGWLSLGGILLCITGSEAMFADLGHFNYMAIQIAFTFLVYPALILAYMGQAAYLSQHHNADLRISYYVSVPESVRWPVLILAILASVVGSQAIISGTFSIINQSQSLGCFPRVKVVHTSEKIHGQVYIPEINWM…
MtHAK5	Medtr4g094660.1	Medicago truncatula	MASRVDTDEEGDNKGSMWDLDQKLDQPMEEEAGRLRNMYREKKFSALLILRLAYQSLGVVYGDLGTSPLYVFYNIFPNGVKDEEEVLGALSLIIYSLTLVPLLKYVFIVLRANDNGQGGTFALYSLLCRHAKIKTIPNQHRTDEELTTYSRSTFHERSFAAKTKRWLEERESWKSAILILVLAGTCMVIGDGILTPAISVLSAVGGIKVNQPHMGNGVVVLIAVVILVGFFSLQHYGTDKVSWLFAPIVLLWFLLIGGIGIFNICKYGSGVLKAFSPVYIYHYFRRGGKQGWTSLGGIMLSITGTEALFADLSHFPVSAVQLAFTLVVFPCLLLAYSGQAAYLMNNLTHSKDAFYRSIPERIYWPVFVVATAAAIVASQATITATFSIIKQALAHGCFP…
MtHAK6	Medtr4g099260.1	Medicago truncatula	MLGGEADRVSIEDETETTKEITEKKLKDRKVSWAKLRRVDSLNLEAGRVSMNANHNSKVGWSVTLTLAFQSIGIVYGDIGTSPLYVYASTFAKGIKNNDDILGVLSLIIYTIVLIPMLKYVFIVLWANDNGNGGAFALYSLICRHIKMSLAPNQQPEDMELSNYKLEIPSSQQKRAHKLKQMLENSHFARIILLLLAIMGTAMVIGDGILTPSISVLSAVSGISTSLGQNAVVGITVAILVVLFSLQRFGTDKVGVLFAPVILIWFIFIGGIGLYNLFKYDIGVLKAFNPKYIVDYFKRNGKEGWLSLGGVFLCITGSEAMFADLGHFSVRAIQISFSFVTFPAILTAYIGQAAYLRQFPDKVGNTFYESIPDPLYWPTFVVAIGAAIIASQAMISGAF…
MtHAK7	Medtr5g034500.1	Medicago truncatula	MDLEGGTRRNSSKKDSWRTVLTLAYQSLGVVYGDLSISPLYVFRSTFGEGIGHSNTNEEIYGVLSLVFWSVTLVPLVKYVFIVLRADDNGEGGTFALYSLLCRYAKVNSLPNCQLADEELSEYKKDGCGGGVSNGKGFAFRLKSTLEKRKVLQKFLLVLALIGTCMVIGDGVLTPALSVFSAISGFELSMSKEHHAYVEVPVACIILVGLFALQHFGTHRVGFMFAPIVMAWLFCISAIGIYNIFHWNSQIYRALCPIYAFRFMRQNQTGGWMALGGVLLSITGSEAMFADLGHFSQLSIQIAFTSVVYPSLILAYMGQAAYLSRHHDTEHAYHFGFYVSVPEKLRWPVLVLAVFAAVVGSQAIITGTFSIIKQCSALNCFPRVKVVHTSSKIHGQIYI…
MtHAK8	Medtr5g070670.1	Medicago truncatula	MENLRNNNSMTEEEDDPGSALSFDSTESRWVFQEDEDPSEIEDYDASDMRHQSMFDSEDEDNAEMKLIRTGPRIDSFDVEALEVPGAHTHHYEDMTTGKKIVLAFQTLGVVFGDVGTSPLYTFSVMFRKAPINDNEDILGALSLVLYTLILIPFLKYVLVVLWANDDGEGGTFALYSLICRNAKVNLLPNQLPSDARISGFRLKVPSAELERSLKLKERLESSFTLKKILLLLVLAGTSMVIANGVVTPAMSVLSSVNGLKVGVDAIQQDEVVMISVACLVVLFSLQKYGTSKVGLAVGPALFIWFCSLAGNGVYNLVKYDSSVFRAFNPIHIYYFFARNSTKAWYSLGGCLLCATGSEAMFADLCYFSVRSVQITFLFLVLPCLLLGYLGQAAYLMEH…
MtHAK9	Medtr5g071630.1	Medicago truncatula	MSPGHSCANVLTLAYQSLGVVYGDLSTSPLYVYKTSFSGKLSLKEDDEEIFGVLSFIFWIFTIIALFKYVFIVMSADDDGEGGTFALYSLLCRHARLSILPNQQPTDENLSAYSTEDSADTWQSSLLKLFFEKHPRFQKGLLIFVLLGTCMTIGDGVITPAISVFSAVLGVQVKINQLHDNYVVIVSCIILVGLFSIQHHGTHRVAFMFAPVVAAWLLCISGIGIYNIFRWNRQVYRALSPVYMFRFLKTTGIEGWLSLTTVLGVETMYADMGHFSALSIKIAFTCLVYPCLILAYMGEAAFLSKHHYDIERSFYKAIPEAVFWPVFIVATFDAVVGSQAVISATFSIISQCCALNCFRVKIVHTSSKIYGQIYVPEVNWILMCLCLAVTIGLWDPNMM…
MtHAK10	Medtr5g071827.1	Medicago truncatula	MSADDNGEGGTFALYSLLCRHARLSILPNQQPTDETLSAYSTEDSADTWQSSLLKLFFEKHPRFQKGLLIFVLLGTCMTIGDGVITPAISVFSAVSGVQVKINQLHDNYVVIVSCIILVGLFSIQHHGTHRVAFMFAPVVAAWLLCISGIGIYNIFQWNRQVYRALSPVYMFRFLKTTGIEGWLSLSGVVLSITGVETMYADMGHFSALSIKIAFTCLVYPCLILAYMGEAAFLSKHHYDIERSFYKAIPEAVFWPVFIVATFAAVVGSQAVISATFSIISQCCALNCFPRVKIVHTSSKIYGQIYVPEVNWILMCLCLAVTIGLRDTNMMGHAYGLAITTVMFVTTCLMTLIIIIVWKQGIIKALTCFLLFGSIELLYISASVCKIPEGGWIPISLSF…
MtHAK11	Medtr5g071860.1	Medicago truncatula	MNPSEQIVEQGISHQNLKRTSCLNVLTLAYQSLGVVYGDLSTSPLYVYKTSFSGKLSLKEDDEEIFGVLSFIFWTFTIIALFKYVFIVMSADDNGEGGTFALYSLLCRHARLSILPNQQPTDETLSAYSTEDSADTWQSSLLKLFFEKHPRFQKGLLIFVLLGTCMTIGDGVITPAISVFSAVSGVQVKINQLHDNYVVIVSCIILVGLFSIQHHGTHRVAFMFAPVVAAWLLCISGIGIYNIFQWNRQVYRALSPVYMFRFLKTTGIEGWLSLSGVVLSITGVETMYADMGHFSALSIKIAFTCLVYPCLILAYMGEAAFLSKHHYDIERSFYKAIPEAVFWPVFIVATFAAVVGSQAVISATFSIISQCCALNCFPRVKIVHTSSKIYGQIYVPEVN…
MtHAK12	Medtr6g007697.1	Medicago truncatula	MDLESVIYKNPVKDDSWKHVLVLAYQSLGVVYGDLSTSPLYVYKSTFAEDIEHSDTNEEIFGVLSFVFWTLTLIPLLKYVFIVLRADDNGEGGTFALYSLLCRHARVSLMPNTQLADEDLAQYTMDETVAVDKKNVGSRLKSLLEKHRVFQRVLLVLALIGACMVIGDGVLTPAISVFSAISGLELSMSKEQHKYVEVPVACAILIFLFALQHYGTHRVGCLFAPVVLTWLICISTIGLYNIIHWNPHVYQALSPYYMFKFLKKTQWGGWMSLGGILLCITGSEAMYADLGHFNQLSIQIAFTFLVYPSLILAYMGQAAYLSKHHALESDYRIGFYVSVPVKLRWPVLAIAILQAVVGSQAIITGTFSIIKQCSSLGCFPKVKIVHTSSKIHGQIYIPE…
MtHAK13	Medtr6g033165.1	Medicago truncatula	MESPLELGLPAVGNFQHTHTVVTSRVVGSRSDGPYFKLGNLNSRGDSVTEFSHRQSRNLLLAYQSFGVVYGDLSTSPLYVYKSTFEGKLQNHHDEETIFGVFSLIFWTLTLIPLLKYVFILLSADDNGEGGTFALYSLLCRHAKFNLLPNQQAADEELSSYKYGPSSQTGASSPLKTFLEKHKRSRTVLLVVVLFGACMVIGDGVLSPAISVLASVSGLKVTETKFNDGELVLLACLILVGLFALQHCGTHRVAFMFAPIVIIWLLSIFILGIYNTIYWNPKIVFAISPHYIIKFFIKTSTQGWISLGGILLCITGAEAMFADLGHFTASSIRLAFAFVIYPCLVMQYMGQAAFLSKNLESVHNSFYDSIPGPVFWPVFVIATMAAIVGSQATITATFS…
MtHAK14	Medtr7g108480.1	Medicago truncatula	MALEEEAVVVNMESIQQNHVSDHPRVPIQEKKQLSLQKYRRNDSLEMESRTISHARYSKGPSTAIILQLAFQSIGIVYGDIGTSPLYVFSSTFTDGIKHNDDILGVLSLIFYTLTLIPLLKYVFFVLRATDNGDGGTFALYSLICRYARVGLIPNQQLEDADVSNYQLQLPNNRREKRASKVKSILENSHFIKLFLLFATMLGTSMVIGDGVLTPCISVLSAVGGIKQADSQITDDQIVLISVAILIGLFMVQRFGTDKVGYSFAPIICIWFTFIGGIGIYNFITHDASVIKAINPKYIVDYFIRNKKDAWISLGGVVLSITGTEALFADVGHFTVRSIQISMCSVTYPALILAYAGQASFLRKNNDLVGETFYKSIPDSLYWPMFVIAVLAAIIASQA…
MtHAK15	Medtr8g022130.1	Medicago truncatula	MSTEGDCANMEEVEIKKWKETMNKKSLKERTTSMANSLTIKAGIVSNITNHSSKLGWMATLALAFQSLGVVYGDIGTSPLYVLASTFPKGIDHTDDILGVLSVIYYTILALPLLKYVFIVLKANDNGNGGAFALYSLLCRHANVSLIPNQQPEDMELSNYKLETPSSNQQLKKKLENSHFARVLLLFMTILGTTMVIGDGVFTPPMSVISAVNGISSKLGQDYVVSITIAILVILFCAQRFGTSKVGFSFAPILTIWFILIGATGIYNVFKYDVRVLLAINPKYIVDYFQRNGKNAWMSLGGVFLCISGCEAMFADLGHFNVRAIQMSFSFITLPAILAAYSGQAAYLRKFPHTVSNIFYECIPGPLYWPTFVVAVVASIIASQAIVSAAFSIISQALS…
MtHAK16	Medtr8g063840.1	Medicago truncatula	MKLDRIEEGSVRLLGSSSGGSSESRWVDGSEVDWDEDPPWSHHGRDGREGYGSIRRRLVKKPKRVDSFDVEAMEIAAGHDQHSKDLSLWPTIALAFQTLGVVYGDMGTSPLYVFAGVFSKVPINSDDDVLGALSLVMYTIALIPLAKYVFIVLKANDNGEGGTFALYSLICRYANVNLLPNRQQADEQISSFKLKLPTPELERALKIKETLERTSIMKNVLLVLVLLGTSMIIGDGILTPAISVMSAISGLQDQINGFGTAEVVSISIVVLVALFSIQQFGTGKVGFMFAPVLALWFFSLGSIGVYNILKYDITVVRALNPAYIYYFFKNNGKSAWSALGGCVLCITGAEAMFADLGHFTVPAIQIAFTCVVFPCLLLAYMGQAAFLMKNPASYSSVFF…
MtHAK17	Medtr8g063900.1	Medicago truncatula	MSSEPKVVIKEEEDNNTEHNHHDNRVYDHSHFSTQKRDSLDMESRSLPSSSHASKGPSMAVIMQLAFQSMGIVYGDLGTSPLYVYTSIFANGVKDNDDILGVFSLIFYTITLVTLVKYVFIVLRATDNGDGGTFALYSLICRYAKVGILPNQQIEDAEVSNYKLESPKDSSMKRASWLKSIIEKSYTIKILLLLVTMLGTSMVIGDGILTPCISVLSAMGGIKVAAPSITDNMVVELSICVLIFLFMVQRLGTDKVGYSFAPIMCLWFTMIGGIGLYNSIKYDPTVLKALNPKYIVEYFIRNKKDAWISLGGVVMCITGAEALFADVGHFTVRSIQISTCGLVYPALILAYTGQSSYLRKHNDAATDAFYKSVPHALYWPMFVVAVMAAIIASQSLISG…
MtHAK18	Medtr8g088200.1	Medicago truncatula	MNSWPNDLHVDSLRLEAGRVPSANNIHASKTSWLGTLSLAFQSLGIIYGDIGTSPLYVYDSTFPDGISNKQDLLGCLSLIIYTISLIVFVKYILVVLWANDNGNGGTCALYSLICRHSKVSLIPNHQPEDIEISHYKLETRSRQKIKHKLENSKFAKLFLFIVTIMATAMVIGDGILTPSISVLSAVSGIRTRSSSLGQGAVLGISIGILIILFGAQRFGTDKVAYAFAPILLVWFLLIGGIGLYNLIKHDIGVLRAFNPKYIVDYMKRNGKEGWISLGGIFMCITGAEAMFADLGHFNVRAVQISFTFITFPTLVCAYSGQAAYLRKFPEQIGSTFYNSTPDLMFWPTFAVSVCAAIIASQAMISGAYAVIQQSQNLGCFPSVKVIHTSAKYEGQVYI…
MtHAK19	Medtr8g099090.1	Medicago truncatula	MSSSDGNRQRGSSSTTVERKSQCKTLFFLTYQSLGFLFGDISLSPLYVYQSIFSGRLKHVQNEDAIFGSFSLIFWTLSLISLLKYAVFMLSADDNGEGGTVALYSHLCRNAKFCLLPNHQASDEELSTYRKPGYSNRNIPPSSLKRFIEKHKNTKIVLLIFVLLGACMIICVGALMPAISVLSSVEGLKIEAKIKNNSMVPLISCVLLVGLFVLQHRGSHTVAFMFPPIIILWLLSIFMIGIYNVIKWNPRIYQAFSPYYIYKFFCVTGKDGWINLGGVFLCVTGTEAMFTDLGYYKQVPVRVAFSCVVYPCLILQYMGQAAFLSKNLSAVPISFYASIPDVLFWPVFVGASLAAIVASQAVISSTFSIVQQCHAFECFPRIKAVHSRRWLNGQIFIPE…
MtHAK20	Medtr8g107510.1	Medicago truncatula	MASQLHPAAHDSKNKRWNQTILLSIQIIGIVYGQLSTAPLYVFGTMRAQDLESEEVVYELFSFIFWTLTTISLIKYAIIVLKADDKGEGGIFALYSLLCRNAKVGLLPCDRTTDEVVLFEETTTPSSKINTDSKARRAIEKHKSCHYLILFLALFGSCMTIGAAVLTPALSVLSASYGVQRSLSDLAQLYVPVPSACVILIGLFVLQPCGTHKIGFMFAPIIAVWLLFVGVVGACNIFIWDVKIIYKISPLYLFKFVRNIDVKRWRLLGSAILCAAGSEAMFAGLGHFSKKSIKITFICLIYPLLVICYAGQAAYISKNLNTRDFNHLSQSVPRPSKHVFIVLSLLSSAVGSQATITASFSIINQCLALNCFPRVKVIHTSKTIHGQIYISDVNWLLMI…
AtKUP1/AtKT1	At2g30070	Arabidopsis thaliana	MNQSPSLIEQGISQQHLKTLSCANVLTLAYQSLGVIYGDLSTSPLYVYKTTFSGKLSLHEDDEEIFGVFSFIFWTFTLIALFKYVFIVLSADDNGEGGTFALYSLLCRYAKLSILPNHQEMDEKLSTYATGSPGETRQSAAVKSFFEKHPKSQKCLLLFVLLGTCMAIGDSVLTPTISVLSAVSGVKLKIPNLHENYVVIIACIILVAIFSVQRYGTHRVAFIFAPISTAWLLSISSIGVYNTIKWNPRIVSALSPVYMYKFLRSTGVEGWVSLGGVVLSITGVETMFADLGHFSSLSIKVAFSFFVYPCLILAYMGEAAFLSKHHEDIQQSFYKAIPEPVFWPVFIVATFAAVVGSQAVISATFSIISQCCALDCFPRVKIIHTSSKIHGQIYIPEVN…
AtKUP2/AtKT2	At2g40540	Arabidopsis thaliana	MDLNLGKCCGSRSSKKESWRSVLLLAYQSLGVVYGDLSISPLYVFKSTFAEDIQHSETNEEIYGVMSFVFWTLTLVPLLKYVFIVLRADDNGEGGTFALYSLICRHVKVSLLPNRQVSDEALSTYKLEHPPEKNHDSCVKRYLEKHKWLHTALLLLVLLGTCMVIGDGLLTPAISVFSAVSGLELNMSKEHHQYAVIPITCFILVCLFSLQHFGTHRVGFVFAPIVLTWLLCISGIGLYNIIQWNPHIYKALSPTYMFMFLRKTRVSGWMSLGGILLCITGAEAMFADLGHFNYAAIQIAFTFLVYPALILAYMGQAAYLSRHHHSAHAIGFYVSVPKCLHWPVLAVAILASVVGSQAIISGTFSIINQSQSLGCFPRVKVIHTSDKMHGQIYIPEINW…
AtKUP3/AtKT4	At3g02050	Arabidopsis thaliana	MAPAESGVSPRRNPSQLSWMNLSSNLILAYQSFGVVYGDLSTSPLYVFPSTFIGKLHKHHNEDAVFGAFSLIFWTLTLIPLLKYLLVLLSADDNGEGGTFALYSLLCRHAKLSLLPNQQAADEELSAYKFGPSTDTVTSSPFRTFLEKHKRLRTALLLVVLFGAAMVIGDGVLTPALSVLSSLSGLQATEKNVTDGELLVLACVILVGLFALQHCGTHRVAFMFAPIVIIWLISIFFIGLYNIIRWNPKIIHAVSPLYIIKFFRVTGQDGWISLGGVLLSVTGTEAMFANLGHFTSVSIRVAFAVVVYPCLVVQYMGQAAFLSKNLGSIPNSFYDSVPDPVFWPVFVIATLAAIVGSQAVITTTFSIIKQCHALGCFPRIKVVHTSKHIYGQIYIPEIN…
AtKUP4/AtTRH1/AtKT3	At4g23640	Arabidopsis thaliana	MADRRNRCNQILLLAYQSFGLVFGDLSISPLYVYKCTFYGGLRHHQTEDTIFGAFSLIFWTITLLSLIKYMVFVLSADDNGEGGIFALYALLCRHARFSLLPNQQAADEEISTYYGPGDASRNLPSSAFKSLIERNKRSKTALLVLVLVGTSMVITIGVLTPAISVSSSIDGLVAKTSLKHSTVVMIACALLVGLFVLQHRGTNKVAFLFAPIMILWLLIIATAGVYNIVTWNPSVYKALSPYYIYVFFRDTGIDGWLSLGGILLCITGTEAIFAELGQFTATSIRFAFCCVVYPCLVLQYMGQAAFLSKNFSALPSSFYSSIPDPFFWPVLMMAMLAAMVASQAVIFATFSIVKQCYALGCFPRVKIVHKPRWVLGQIYIPEINWVVMILTLAVTICF…
AtKUP5/AtKT5	At4g33530	Arabidopsis thaliana	MFHVEEESSGGDGSEIDEEFGGDDSTTSLSRWVFDEKDDYEVNEDYDDDGYDEHNHPEMDSDEEDDNVEQRLIRTSPAVDSFDVDALEIPGTQKNEIEDTGIGKKLILALQTLGVVFGDIGTSPLYTFTVMFRRSPINDKEDIIGALSLVIYTLILIPLVKYVHFVLWANDDGEGGTFALYSLICRHANVSLIPNQLPSDARISGFGLKVPSPELERSLIIKERLEASMALKKLLLILVLAGTAMVIADAVVTPAMSVMSAIGGLKVGVGVIEQDQVVVISVSFLVILFSVQKYGTSKLGLVLGPALLLWFFCLAGIGIYNLVKYDSSVFKAFNPAYIYFFFKRNSVNAWYALGGCVLCATGSEAMFADLSYFSVHSIQLTFILLVLPCLLLGYLGQAA…
AtKUP6/AtHAK6/AtKT6	At1g70300	Arabidopsis thaliana	MEIESGSYQNAKKESWRTVLTLAYQSLGVVYGDLSISPLYVYKSTFAEDIHHSESNEEIFGVLSFIFWTITLVPLLKYVFIVLRADDNGEGGTFALYSLLCRHARVNSLPSCQLADEQLIEYKTDSIGSSSMPQSGFAASLKSTLEKHGVLQKILLVLALIGTCMVIGDGVLTPAISVFSAVSGVELSMSKEHHKYIELPAACVILIGLFALQHYGTHRVGFLFAPVILLWLMCISAIGVYNIFHWNPHVYQALSPYYMYKFLKKTQSRGWMSLGGILLCITGSEAMFADLGHFSQLSIKIAFTSLVYPSLILAYMGQAAYLSQHHIIESEYNIGFYVSVPERLRWPVLVIAILAAVVGSQAIITGTFSIIKQCSALGCFPKVKIVHTSSKIHGQIYIP…
AtKUP7/AtHAK7/AtKT7	At5g09400	Arabidopsis thaliana	MAEESSMEGSEKEEIDSSGGGFGDMASMDSIESRWVIQDDDDSEIGVDDDNDGFDGTGLESDEDEIPEHRLIRTGPRVDSFDVEALEVPGAPRNDYEDLTVGRKVLLAFQTLGVVFGDVGTSPLYTFSVMFSKSPVQEKEDVIGALSLVLYTLLLVPLIKYVLVVLWANDDGEGGTFALYSLISRHAKISLIPNQLRSDTRISSFRLKVPCPELERSLKLKEKLENSLILKKILLVLVLAGTSMVIADGVVTPAMSVMSAVGGLKVGVDVVEQDQVVMISVAFLVILFSLQKYGTSKMGLVVGPALLIWFCSLAGIGIYNLIKYDSSVYRAFNPVHIYYFFKRNSINAWYALGGCILCATGSEALFADLCYFSVRSVQLTFVCLVLPCLMLGYMGQAAY…
AtKUP8/AtHAK8/AtKT8	At5g14880	Arabidopsis thaliana	MDLERLSPRNPVKKESWWTVLTLAYQSLGVVYGDLATSPLYVYKSTFAEDITHSETNEEIFGVLSLIFWTLTLIPLVKYVFIVLRADDNGEGGTFALYSLLCRHARISSLPNFQLADEDLSEYKKNSGENPMRLKVPGWSLKNTLEKHKFLQNMLLVLALIGTCMVIGDGVLTPAISVFSAVSGLELSMSKQQHQYVEVPVVCAILILLFSLQHYGTHRLGFVFAPIVLAWLLCISTIGVYNIFHWNPHVYKALSPYYIYKFLKKTRKRGWMSLGGILLCITGSEAMFADLGHFTQLSIQIAFTFAVYPSLILAYMGQAAYLSKHHVLQSDYRIGFYVSVPEQIRWPVLAIAILAAVVGSQAIITGTFSIIKQCTSLGCFPKVKIVHTSSRMHGQIYIP…
AtKUP9/AtHAK9/AtKT9	At4g19960	Arabidopsis thaliana	MAERVEASSVPEGENTIEEREVGAMWELEQKLDQPMDEEANKLNNMYREKGLSMLMLLRLSFQSLGIVYGDLGTSPLYVFYNTFPDGIDDSEDVIGALSLIIYSLLLIPLIKYVFIVCKANDNGQGGTLAIYSLLCRHAKVKLIPNQHRSDEDLTTYSRTVSAEGSFAAKTKKWLEGKEWRKRALLVVVLLGTCMMIGDGILTPAISVLSATGGIKVNNPKMSGDIVVLVAIVILIGLFSMQHYGTDKVGWLFAPIVLIWFLFIGATGMYNICKYDTSVLKAFSPTYIYLYFKRRGRDGWISLGGILLSITGTEALYADIAYFPLLAIQLAFTFFVFPCLLLAYCGQAAYLVIHKEHYQDAFYASIPDSVYWPMFIVATGAAIVGSQATISGTYSIVKQ…
AtKUP10/AtHAK10/AtKT10	At1g31120	Arabidopsis thaliana	MAGRVESSIGGGEIDEEGDERGSMWDLDQSLDQPMDEEAGRLRNMYREKKFSAFLLLQLSFQSLGVVYGDLGTSPLYVFYNTFPRGIKDPEDIIGALSLIIYSLTLIPLLKYVFVVCKANDNGQGGTFALYSLLCRHAKVSTIPNQHRTDEELTTYSRTTFHERSFAAKTKRWLENGTSRKNALLILVLVGTCMVIGDGILTPAISVLSAAGGLRVNLPHINNGIVVVVAVVILVSLFSVQHYGTDRVGWLFAPIVFLWFLFIASIGMFNIWKHDPSVLKAFSPVYIFRYFKRGGQDRWTSLGGIMLSITGIEALFADLSHFPVSAVQFAFTVIVFPCLLLAYSGQAAYLRKYPHHVEDAFYQSIPKRVYWPMFIIATAAAIVASQATISATFSLIKQA…
AtKUP11/AtHAK11/AtKT11	At2g35060	Arabidopsis thaliana	MAARVEAATMGGEIDEEESDERGSMWDLDQKLDQSMDEEAGRLRNMYREKKFSALLLLQLSFQSLGVVYGDLGTSPLYVFYNTFPHGIKDPEDIIGALSLIIYSLTLIPLLKYVFVVCKANDNGQGGTFALYSLLCRHAKVKTIQNQHRTDEELTTYSRTTFHEHSFAAKTKRWLEKRTSRKTALLILVLVGTCMVIGDGILTPAISVLSAAGGLRVNLPHISNGVVVFVAVVILVSLFSVQHYGTDRVGWLFAPIVFLWFLSIASIGMYNIWKHDTSVLKAFSPVYIYRYFKRGGRDRWTSLGGIMLSITGIEALFADLSHFPVSAVQIAFTVIVFPCLLLAYSGQAAYIRRYPDHVADAFYRSIPGSVYWPMFIIATAAAIVASQATISATFSLVKQ…
AtKUP12/AtHAK12/AtKT12	At1g60160	Arabidopsis thaliana	MEEIEEGSSNNSIRRVGTGSSDRRWVDGSEVDSETPLFSEIRDRDYSFGNLRRRLMKKPKRADSLDVEAMEIAGSHGHNLKDLSLLTTLGIAFQTLGVVYGDMGTSPLYVFSDVFSKVPIRSEVDVLGALSLVIYTIAVIPLAKYVFVVLKANDNGEGGTFALYSLICRYAKVNKLPNQQPADEQISSFRLKLPTPELERALGIKEALETKGYLKTLLLLLVLMGTSMIIGDGILTPAMSVMSAMSGLQGEVKGFGTNALVMSSIVILVALFSIQRFGTGKVGFLFAPVLALWFFSLGAIGIYNLLKYDFTVIRALNPFYIVLFFNKNSKQAWSALGGCVLCITGAEAMFADLGHFSVRSIQMAFTCVVFPCLLLAYMGQAAYLTKHPEASARIFYDSV…
AtHAK5	At4g13420	Arabidopsis thaliana	MDGEEHQIDGDEVNNHENKLNEKKKSWGKLYRPDSFIIEAGQTPTNTGRRSLMSWRTTMSLAFQSLGVVYGDIGTSPLYVYASTFTDGINDKDDVVGVLSLIIYTITLVALLKYVFIVLQANDNGEGGTFALYSLICRYAKMGLIPNQEPEDVELSNYTLELPTTQLRRAHMIKEKLENSKFAKIILFLVTIMGTSMVIGDGILTPSISVLSAVSGIKSLGQNTVVGVSVAILIVLFAFQRFGTDKVGFSFAPIILVWFTFLIGIGLFNLFKHDITVLKALNPLYIIYYFRRTGRQGWISLGGVFLCITGTEAMFADLGHFSVRAVQISFSCVAYPALVTIYCGQAAYLTKHTYNVSNTFYDSIPDPLYWPTFVVAVAASIIASQAMISGAFSVISQSL…
OsHAK1	Os04g32920	Oryza sativa	MSSALEVEGSGSPGVEPAATATASRLKRHDSLFGDAEKVSGGKHHGGSAVSWAVTLHLAFQSVGIIYGDIGTSPLYVYSSTFPDGIGHRDDLVGVLSLILYTLIIIPMLKYVFIVLYANDNGDGGTFALYSLISRYAKIRMIPNQQAEDAMVSNYSIEAPSSQLRRAQWVKHKLESSRAAKMALFFLTILGTSMVMGDGTLTPAISVLSAVSGIREKAPNLTQTQVVLISVAILFMLFSVQRFGTDKVGYTFAPIISVWFLLIAGIGLYNLVVHEITILKAFNPWYIVQYFRRNGKKGWVSLGGVVLCVTGTEGMFADLGHFNIRAVQISFNCILFPSVALCYIGQAAYLRKFPENVSDTFYKSIPGPLFWPTFIVAILAAIIASQAMLSGAFAILSKA…
OsHAK2	Os01g70940	Oryza sativa	MDAEAGVGGADQLPWRQHYRNLLLLAYQSFGVVYGDLSTSPLYVYKSTFSGRLRRYQDEQTVFGVLSLIFWTFTLIPLLKYVTIVLSADDNGEGGPFALYSLLCRHAKLSFLPNQQSADEELSTYYRNGFTSRHGSLPWLRRFMEKHKNARTVLLLIVLCGASMMIGDGILTPAISVLSSMSGLKVRATGLHDRSVVLLSCIVLVGLFALQHRGTQKVAFMFAPIVVIWLFCIGGIGLYNIIHWNPRIYQALSPYYIVKFFRTTGKDGWIALGGILLSMTGCEAMFADLGHFTSASVRLAFITIIYPCLILQYMGQAAFLSKNILDMPTGFYDSIPGPIFWPVFVVATLAAVVGSQAVISATFSIVKQCHSLGCFPRVKVVHTSRWIYGQIYIPEINWI…
OsHAK3	Os01g27170	Oryza sativa	MPVADCESGLSPADVTGAGAANGNPGHWRSYYRHVLLLAYQSCGVVYGDLSTSPLYVYKSTFIIGSLRRFQDEEIVFGVFSLVFWTLTLIPLLKYVFIVLAADDNGEGGTFALYSLLVRHAKFSLMPNQEAADEELTSYYRPGYAPQETPILTALRRFLENHRKSRTFLLVTVLFGASLVIGDGVLTPPMSVLSSFSGLQVHSTALTSGEVEILSCTVLVCLFMVQHWGTHRVAFLFAPVVIVWLLLLGALGVYNIVVWNPRVLRALSPYYLVRFFQHTGKDGWISLGGILLSMTGTEAMYADLGHFTAASIRVAFVGLIYPCLVLQYMGQAAFLSKSPHCDIHFVFFESIPTGIFWPVLVIATLAAIVGSQAVISATFSIVRQCTALGCFPRVKIVHT…
OsHAK4	Os08g36340	Oryza sativa	MSSSHTVTVSMDVEAGQKNKDKKGISQDLILAYKTLGVVFGGLVTSPLYVYPSMNLTNPTEEDYLGIYSIMFWTLTLIGVVKYICIALNADDHGEGGTFAMYSLLCQHANIGILPSKKIYTEEENLISNQPVVAGRPGRLRRFIESSIIARRLLLLTAILGMCMLIGDGILTPAISVLSAIDGLRGPFPSVSKPAVEGLSAAILVGLFLLQKYGTSKVSFMFSPIMAAWTFATPVIGVYSIWRYYPGIFKAMSPHYIVRFFMTNQTRGWQLLGGTVLCITGAEAMFADLGHFSKRSIQIAFMSSIYPSLVLTYAGQTAYLINNVDDFSDGFYKFVPRPVYWPMFIIATLAAIVASQSLISATFSVIKQSVVLDYFPRVKVVHTSKDKEGEVYSPETNYM…
OsHAK5	Os01g70490	Oryza sativa	MTEPLHTSSNGGAERGPNAAFESEKTLQTTTRLQRFDSLHMEAGKIPGGQSHTAKVGWATTLHLAFQSIGVVYGDMGTSPLYVFSSTFTNGIKDTNDILGVMSLIIYTVVLLPLIKYCFIVLRANDNGDGGTFALYSLISRYARISLIPNQQAEDAMVSHYKLESPSNRVKRAHWIKEKMENSPNFKIILFLVTILATSMVIGDGVLTPCISVLSAVGGIKESAKSLTQGQIAGIAIAILIVLFLVQRFGTDKVGYSFGPIILTWFIFIAGTGVYNLFKHDTGVLKAFNPKYIVDYFERNGKQGWISLGGVILCITGTEAMFADLGHFNVRAIQIGFSVVLLPSVLLAYIGQAAYLRIYPEHVADTFYKSIPDPLYWPTFVVAVAAAIIASQAMISGAF…
OsHAK6	Os01g70660	Oryza sativa	MVPPGNGNGAAAAAGNDVILELSTPGDDWSHELQGDDVEANGGGNGDAPPRRTFSFGQAYKTRHRQPQVFTVWQTLMLGYQSLGIVYGDLGTSPLYVFPSVVLPDADATDFLGILSLIIWTLTLMSLVKYALIVLKADDHGEGGTFALYSLLRQHVNFKGNIPVPLTRLESDVHLKFHSKRRSRPSRLQLFLENSPKAQLAITIIVLIGTCMLIGDGALTPAISVLSAVQGIQSRSSHIKQKHVVVLSAVILVLLFLVQRFGTSRVSFTFSPIMLLWFASIAGIGVYNIVMHYPPVLKAVSPHYIYYYFAKNKRVGWEQLGAVILCITGAEAMFADMGHFNKSSIQVAFSTAVFPSLILAYSGQAAYLIKNPGDLSTAFYSSVPAPLFWPMFVVSTLAA…
OsHAK7	Os07g47350	Oryza sativa	MPSYQYLLSLLFYILDCTDRFSVIVTIHNHRVGVLMIVLLQDQWKSYCRTISLLAFQSFGVVYGDLSTSPLYVYKSAFSGRLNNYRDETTIFGLFSLIFWTLTLLPLLKYVIIVLNADDNGEGGTFALYSLLCRHAKFSLLPNQQSADEELSTYYQPGVGGIISSPLKRFLEKHRKLRTCLLLFVLFGACMVIGDGVFTPAISVLSAISGLKDPGPGGIPDGWVVFIACIVLVGLFALQHRGTHRVAFMFAPIVVVWLLSIGVIGLYNIIHWNHRIFLALSPHYVIKFFKMTGKDGWLSLGGVLLAITGTEAMFADLGHFTAASIRLAFVGAIYPCLVLQYMGQAAFLSRNMSAVEDSFYQSVPRSLFWPVFVIATLAAVVGSQSIISATFSIVKQCLS…
OsHAK8	Os03g21890	Oryza sativa	MDLEFGRGMRSPQRDSWKTTLLLAYQSLGVVYGDLSISPLYVFKSTFAEDIQHSETNEEIFGVLSFVFWTLTLIPLIKYVSIVLRADDNGEGGTFALYSLICRHANVSLLPNRQIADEELSTYKLECSSERTDKSCIKVWLEKHKKLHTALLIMVLIGTCMVIGDGVLTPAISVFSAVSGLEFSLSKDHREYAVIPITCVILAFLFALQHYGTHRVGFLFAPIVLAWLICMSALGLYNIIHWNPHVYQALNPCYMFKFLKKTRKYGWMSLGGILLCMTGSEAMFADLGHFSYSAIQLAFTSLVYPALILAYMGQAAYLSKHHDFYSNSQVGFYIAVPDKVRWPVLVLAILASVVGSQAIISGTFSIINQSQSLSCFPRVKVVHTSDKIHGQIYIPEINW…
OsHAK9	Os07g48130	Oryza sativa	MDPEFGRGMAPRKREPWRTTLLLAYQSLGVVYGDLSISPLYVYKSTFAEDITHSESNEEIFGVLSFVFWTLTLIPLIKYVSIVLRADDNGEGGTFALYSLICRHANVSLLPNRQVADEELSTYKLEYPPEVANRSRIKEWLEKHKTLQTALLIMVMIGTCMVIGDGVLTPAISVFSAVSGLELSLSRDQHEYAVIPITCVILVFLFALQHYGTHRVGFLFAPIVLAWLICMSMLGLYNIIHWNPQVYRALNPYYMLKFLRKTKKSGWMSLGGILLCMTGSEAMFADLGHFSYSAIQLAFTTLVYPALILGYMGQAAYLSKHHTLNSTYQIGYYISVPESVRWPVLVLAILASVVGSQAIISGTFSIINQSQSLSCFPRVKVVHTSENIHGQIYIPEINW…
OsHAK10	Os06g42030	Oryza sativa	MKSPSPVDPESPSSPDCKGGSSSKRRRLPWRMTMSLAYQSLGVVYGDLSTSPLYVYKAAFAEDIQHSETNEEILGVLSFVFWTLTLVPLLKYVCVVLRADDNGEGGTFALYSLLCRHARAALLPPGGGGGGGEPGDEDQFLDAGADKKAAANGNALALSGRGGGGGAAAGVRRLLERHKVLQRVLLVLALVGTCMVIGDGVLTPAISVFSAVSGLELSMEKHQHKYVEVPIACFVLVCLFCLQHYGTHRVGFLFAPIVITWLLCISMIGVYNIVHWEPNVYRALSPYYMYKFLKKTQRGGWMSLGGILLCITGSEAMFADLGHFNQLSIQIAFTCMVYPSLILAYMGQAAYLCKHHIIESDYRIGFYVSVPEKIRWPVLAIAILAAVVGSQAVITGTFS…
OsHAK11	Os04g52390	Oryza sativa	MASLSESEGTNRGSMWELDQNLDQPMDEEASRLKNMYREKKFSSLLLLRLAFQSLGVVFGDLGTSPLYVFYNAFPHGVDDEEDVIGALSLIIYTLTLIPLLKYVFVVLRANDNGQGGTFALYSLLCRHAKISTIPNQHKTDEDLTTYSRQTYEENSVGAKIKRWLEAHAYKRNCLLIVVLIGTCTAIGDGILTPAISVLSASGGIKVQNPNMSTDVVVIVSVIILIGLFSMQHYGTDKVGWLFAPIVLLWFILIGSVGALNIHKYKGSVLKAYNPVYIYRYFQRRNSDSWASLGGIMLSITGTEALFADLCHFPVFAIQIAFTLIVFPCLLLAYTGQAAYIIAHKDHVADAFYRSIPDSIYWPAFVIATAAAIVASQATISATYSIIKQALALGCFPRV…
OsHAK12	Os08g10550	Oryza sativa	MASISDSETTNHGSIWDLDQNLDQPMDEEASRLKNMYTEKKFSSILLLRLAFQSLGVVFGDLGTSPLYVFYNIFPHGVDDDEDVIGALSLIIYTLTLIPLMKYVFVVLRANDNGQGGTFALYSLLCRHAKVSTIPNQHKTDEELTTYSRQTYEENSLAAKIKRWLEGHVYKKNCLLILVLIGTCTAIGDGILTPAISVLSASGGIRVQNQKMSTDVVVVVAVIILIGLFSMQHYGTDKVGWLFAPIVLLWFILIGTIGALNIHKYNSSVLKAYNPVYIYRYFRRGKSESWTSLGGIMLSITGTEALYADLCHFPVLAIQIAFTLVVFPCLLLAYTGQAAYIISNKDHVVDAFYRSIPDTIYWPVFIIATLAAIVASQATISATYSIIKQALALGCFPRV…
OsHAK13	Os06g45940	Oryza sativa	MDVEGGGGGGGGAPPRGRNSWGWQKGTLLLAYQSFGVVYGDLCISPVYVYKNTFSGKLRLHEEDEEILGVLSLVFWSLTLIPLLKYIILVLGADDNGEGGTFALYSLLCRNSKMGLLNNMRANHGSLSAYNKEEPCKESRNSMLIKAFFEKHYSLRVVLLLFVLMGTSMVIGDGVLTPTMSVLAAVSGLRIKFPELHENYTVLLACVILIGLFALQHYGTRRVGFLFAPILISWLTCIGGIGIYNIIKWNPSVIRALSPYYIYNFFRKAGKDGWSSLGGIVLCLTGAEAMFADLGHFSKLSLRLGFTIVVYPCLVLAYMGEAAYLSKHREDLQSSFYKALPDRVFWPVLFIATLATAVGSQAIISATFSIISQCRALGCFPRIKVVHTSSHVHGQIYIP…
OsHAK14	Os07g32530	Oryza sativa	METRSGGSGSASGGGGGGRMRLRKTESAEMRWVVSGGAYEEDEIESSDGGGGTPAAASGSRGGCSDSDDNYEEAEMLRQRLVRTGPRADSLDVEAQDVAGMNRHQEITVGRSIVLAVQTLGVVFGDVGTSPLYAFDVMFNKYPITSKEDVLGALSLVIYTLILIPLLKYTLIALWGNDDGEGGTFALYSLICRNARVSLLPNQLRSDTRISSFQLQVPSVELERSLKIKERLETSSMLKKLLLMLVLFGTSMVIADGVVTPAMSVMSAVNGLKVGISSVNEGEVVMITVAVLIVLFTLQRFGSSKVALAVGPALFIWFCCLAGIGIYNMKTYGSAVLQAFNPMYIYYYFERNPTQAWMSLGGCLLCATGSEAMFADLCYFSVKSVQLTFVFLVLPCLLL…
OsHAK15	Os04g52120	Oryza sativa	MAASSSSSASASAMGGGGMRKAPSMEWRWVSTEEDDEGEEDGDTVEAAAAAVGAVGRGGSFGSEEEEDEEDGGGGGEGEGEGEDGEKQKLIRTVPSVDWFDVEGYEVSVAQHIEDSEEFDFGRTMFLALQTLAVVFGDIGISPLYTFDVMFSKYPILGEEDVLGALSLVLYTLISMPLVKYVLVVLWANDDGEGGIFALYSLICRNAKVSLIPNQVHSEKRMSSFRLKLPTPELERSIKVKEKLESSLLLKKLLLGLVLFGTAMFISNGVITPAMSVLSAVSGLKVGIPNASQGLVVMISVVLLVILYSVQRYATSKMGFALGPSLLIWFCCLGGIGIYNLSTYGPAAFKAFNPLYIIYYFGRNPFQAWLSLAGCLLCATGSEAIFANLSYFPVRYVQS…
OsHAK16	Os03g37840	Oryza sativa	MAQQQAGARGSKLEIVAARGGSGGSSSAGDAEAPPLDVLRQDSLYRDATRPAHGHHGQESWMRTLRLGFQCVGILHADLGTSPLYVYQNTFKYGIKHEDDIIGVLSLIIYSFVLFTMVKIVFIALHANDDGDGGTFALYSLISRYAKVCLIPNQQAEDELVTRYNDHGKPPATLRRAQWMKSQLEKKPAKIAVFFLTIFATALAISDCVLNPSVSVLSAVNGLKLRAPHLTTDEVVWITVGILVVFFAVQRFGTDKIGYTFAPVVVVWLLLISGIGIYDLVKYDVGVLRAFNPKYIIDYFRRNKKDGWVQLGEVLLTFTGTEALFADLGYFSIKSIQLSSTFVLLPSVLCTYIGQAAYLRKHMDQQHIQNAFFNSIPRPLFWPMFVLAIMTSVIGCQAM…
OsHAK17	Os09g27580	Oryza sativa	MWFIALLRCVPNRNLKYHLCVLQFILMFSLNSEQDSNVWKDLFLAYKTLGVVFGGLVTSPLYVYPSMNLSSPTEADYLGIYSIMFWTLTLIGVVKYVCIALNADDHGEGGTFAMYSLLCRHADIGILPSKRVYAEEDPLLHSQSAIARRPSRLGKFFEQSITARRVLLFVAVLGMCMLIGDGILTPAISVLSAIDGIRGPFPTVSKPVVEALSAAILIGLFLLQKYGTSKVSFLFSPIMAAWTFTTPIIGLYSIVHYYPGIFKAISPYYIVHFFLRNKRQGWQLLGGTVLCITGAEAMFADLGHFSKKAIQIAFLSSIYPSLVLTYAGQTAYLINNVNDFGDGFYKFVPRPVYWPMFVVATLAAIVASQSLISATFSVIKQSVVLDYFPRVKVVHTSQH…
OsHAK18	Os09g38960	Oryza sativa	METRTNEYSRKGAMWELERNLDQPMDAEAGRLRNMYREKTYPTILLLRLAFQSLGVVFGDLGTSPLYVFYNIFPHGIEDTEQVIGALSLIIYSLTLIPLVKYVFIVLRANDNGQGGTFALYSLLCRHAKINIIPNQHRTDQDLTTYSRRTYEEKSLAAKIQRWLEGHQFRKNLILILVLFGTCMAVGDGILTPAISVLSATGGIQVEEGRMRNDVVVIISVLILIGLFSMQHYGTDKVSWLFAPIVFVWFILIGILGAVNICKYDHSVLKAFNPVYVYRYFKRGKTSWTSLGGIMLSITGTEALFADLSYFPVQAIQIAFTVVVFPCLLLQYTGQAAFIAANTNQVSHAFYISLPAPILWPAFAVATAAAIVASQATISATYSIIKQALALGCFPRVKI…
OsHAK19	Os02g31910	Oryza sativa	MSVQEDGAARPEPDVLRRHDSLYGDAEKVSNNKRHGAGGSWARTLQLAFQSIGVVYGDVGTSPLYVYSSTFPNGIKHPDDLVGVLSLILYTLILIPMVKYVFIVLYANDNGDGGTFALYSLISRHAKIRMIPNDQTEDANVSNYSIEAPSSQLRRAEWVKQKLESSNAAKIALFTITILGTSMVMGDGTLTPAISVLSAVSGIREKAPNLTQSQVVWISVAILFVLFSMQRFGTDKVGYTFAPVISVWFLLIAGIGMYNLTVHEITILRAFNPKYIVDYFRRNGKEAWVSLGGVVLCITGTEAMFADLGHFNIRAIQLSFTCVLFPSVALCYMGQAAYLRKFPENVGDTFYRSIPAPLFWPVFVVAIMGAIIASQAMLSGAFAILSKALSLGCFPRVEV…
OsHAK20	Os02g31940	Oryza sativa	MSVQEDDDAAGPEVDRLRRHDSFYGDAEKVSNDKSHGTGENWARTLQLAFQSIGVVYGDVGTSPLYVYSSTFPDGVKHPDDLVGVLSLMLYTLILIPMVKYVFIVLYANDNGDGGTFALYSLISRHAKIRMIPNDQTEDANVSNYSIEAPSSQLRRAEWVKQKLESSNAAKIALFTITILGTSMVMGDGTLTPAISVLSAVSGIREKAPSLTQLQVVWISVPILIVLFSVQRFGTDKVGYSFAPVISVWFVLIAGIGAYNLAVHEITILRAFNPMYIIDYFRRNGKEAWVSLGGAVLCITGTEAMFADLGHFNIRAIQLSFTCVLFPSVALCYMGQAAYLRKFPEDVGDTFYKSLPAPLFWPVFVVAIMAAIIASQAMLSGAFAILSKALPLGCFPRVE…
OsHAK21	Os03g37930	Oryza sativa	MDPGVEKKKQQMELVDVESGGLPVERQDSLFREAVRAEHAGAAHWDEQDSWGRTMSLAFQCVGILYGDIGTSSLYVYSSTFEHGIGHPDDVVGVLSLIVYSFMLFTVIKIVFVALHANDHGDGGTFALYSLISRHAKVSLIPNHQAEDELISGYSSSGKPSATLRRAHWLKQLLEASKAAKISLFLLTILAIAMVISDAVLTPPISVLSAVGGLREKVPHLTTDQIVWITVAILVVLFAIQRYGTDKVGYSFAPIILLWLLLIGATGLYNLIKHDISVLRAFNPKYIIDYFRRNKKEGWVSLGSILLCFTGSEALFANLGYFSIRSIQLSFSFALLPSVLLTYIGQAAFLSKNPKNVANTFFAATPISLFWPTFIMAIAASIIGSQAMISCAFATVSHL…
OsHAK22	Os07g01214	Oryza sativa	MAQQQGQGAGTTTVAMMSRNPSYYYSGEGELSLAVQRQDSLYRDASRAGQHEQAHGEGWARTLRLAFQCFGVLYGDIGTSPLYVYSTTFDGGIRHTDDLLGVLSLIIYSFLLFTIIKYVYIALRANDDGDGGTFALYSLISRHAKVSLVPNQQAEDELHLHISKSSSLRRPSVQRLASTAEERAQWVKDLLENSRPVRISLFLLTILATAMVISDACLTPAISVLSAVGGLKDKAPHLNTEQVVWVTVGILVMLFAVQRFGTDKVGYLFAPVVLLWLLLIGGVGVYNLAAHDVGVLRAFNPKYILDYFRRNGRHGWVSLGGVLLCFTGTEALFADLGCFSIRSIQLSFAFGLVPAVLLAYAGQAAYLRVYPDHVGDAFYASTPQVLFWPTLVLALAASV…
OsHAK23	Os09g21000	Oryza sativa	MDDDDSGIQEEPAPPPPPPPPPPPPPPLRRLLTATRSGGSRWVDGSEVGSSESAPWSLDGDRSLRLSVDSAASAGGASGGGGGGGPLSRASSGAFRRRFGKQPRRVDSLDVEAMSVRGAHGHSSKEISMLSTVAMAFQTLGVVYGDMGTSPLYVFSDVFSKVPIKSEVEILGALSLVMYTIALIPFAKYVFIVLKANDNGEGGTFALYSLICRYAKVSLLPNQQRVDEDISSFRLKLPTPELERALSVKESLEKNPVFKNILLFLVLMGTSMVIGDGILTPSMSVMSAVSGLQGRVPGFGTDAVVIVSILFLVLLFSVQRFGTGKVGFMFAPILALWFINLGTIGIYNLAKYDISVVRAFNPVYIYLFFQTNGIKAWSALGGCVLCITGAEAMFADLGH…
OsHAK24	Os06g15910	Oryza sativa	MDVEGGGAAARRKGGWWWWREEAVLAYQSLGVVYGEVAAAPLYVYRSAFAGGDIEHSAGNEEIYGALSLVFWTLTLVPLAKYVLLVLRADDAGEGGTFALYSLICRRVRAGLLPPCAAAAAGEELDAAGAAAAPVSAVRAALERHRVLQRLLLLLALLGTCMVIGDGVLTPAVSVFSAVSGLELSMDKDQHKYILLPITCVILVCLFALQHYGTHRVGFLFAPIVCLWLLCISIIGVYNIIHWNPHVYQALSPYYMYKFLRKTQTGGWMSLGGILLCVTGSEAMYADLGHFTQNSIKMAFTLLVYPALVLAYMGQAAYISRHHNFEDGSHIGFYVSVPEKIRWPVLGIAILASVVGSQAIITGTFSIIKQCSSLNCFPRVKIVHTSSTVHGQIYIPEIN…
OsHAK25	Os02g49760	Oryza sativa	MDLEAAHGAAAAPGKRRRRARESWGASLLLAYQSLGVVYGDVATSPLYVYKSAFAGDDIQHSAGNEEIYGVLSFVFWTLTLISLVKYVLIVLRADDGGEGGTFALYSLICRHVRAGLLPGGGGGAGDELAVGGRRDARAMSRLRAMLERYRVLQRLLLLFALLGTCMVIGDGVLTPAVSVYSAVSGLELSMEHEHHKYVQLPVTCAILIGLFALQHYGTHRVGFIFAPIVCVWLLCISAIGVYNIVHWNHHVYRALSPYYMYQFLKKTQTGGWMSLGGILLCVTGSEAMYADLGHFSQSSIKIAFMSVVYPALVLAYMGQAAYISQHHSFENAYHIGFYVSVPEKLRWPVLVIAILAAVVGSQAVITGTFSIIKQCSSLSCFPGVKIVHTSSTVHGQIY…
OsHAK26	Os08g39950	Oryza sativa	MEYHHRPHSPPPSDDDVVVIQMNAAAIAAVDEWSSTNEVDDAAAGKGGGLTRRTFSQAYKMKHRTPLEFTWRQVALLSFQSLGVVYGDLGTSPLYVFSSISLDDPGEADFVGILSIILWTFTMICLVKYVFIVLKADDHGEGGTFALYSLLRQHVNFKGNMPVPVTHLASDINLKFHSKKRILTSKLLKFLEQSTKWQAVITYIVLAGTCMVLGDGALTPAISVLSAVQGIQSRSSSITQAHVVLLSVIILFILFFFQKHGTSKVSFTFSPIMILWFTFVAFIGLYNIIKHYPPILKAVSPHYIIIYFIRNKRAAWETLGAIVLCITGAEAMFADLGHFNKSSIQMAFSVIVYPSMILAYAGQAAFLVKNPSKLSTTFYSSTPEPLFWPMFIIATLAAI…
OsHAK27	Os03g37830	Oryza sativa	MGDDVLGRGSRRDQEIVLVDIVDDDDHDDVPAVRRQDSLYVDATRAGGANHRGGQEESWARTLKLAFQCVGILYGDIGTSPLFVYSSTFKDGVRHPDDLLGALSLIIYSFALFTIVKYVFIALRANDDGDGGTFALYTLISRHAKVSLIPNQQAEDELISKYNTGKPQATLRRARWMKELLETNRAVKIWLFLLTILATAMVISDAVLTPAISVLSAVGGLKEKAPNLTTDEIVWITVATLVVLFAIQRFGTDKIGYLFAPIILLWLLLIGCVGIYNTIKFDTGVLRAFNLKYIIDYFRRNKKDGWISLSGILLCFTGTEALFSDLGYFSIRSIQLSFSFGLVPSVLLAYIGQAAYLREHPEHIANTFYRSTPNVMFWPTFILAVAASIIGSQAMISCA…
