# Supplementary material for: Genome-wide identification, characterization and expression analysis of HAK genes and decoding their role in responding to potassium deficiency and abiotic stress in Medicago truncatula
Source: PeerJ. 2022 Sep 22;10:e14034. doi: 10.7717/peerj.14034 (PMC9509677; doi:10.7717/peerj.14034)
Supplement: Supplemental Information 3 [file peerj-10-14034-s003.xlsx]

## Sheet: Table-S2
Table S2 Conserved amino acid motifs and annotation of MtHAKs
No.	E-value	Width	N Sites	Consensous sequence	Annotation
Motif1	0	41	19	KYVFIVLRABDNGEGGTFALYSLJCRHAKVSLLPNQQPTDE	K_trans
Motif2	0	38	20	RVKVVHTSKKIHGQIYIPEINWILMILCJAVTIGFRDT	K_trans
Motif3	0	41	20	TGSEAMFADLGHFSVRSIQIAFTFVVYPCLJLAYMGQAAYL	K_trans
Motif4	0	50	20	HFITNLPAIHSVVVFVCIKSVPVPYVPEEERFLFRRIGPKEYRIFRCIVR	K_trans
Motif5	0	34	20	LFSJQHYGTHKVGFMFAPIVLIWFLCIGGIGIYN	K_trans
Motif6	0	50	19	MYVWHYGTVKKYEFELHNKVSMEWLLELGPSLGIVRVPGIGLJYTELVSG	K_trans
Motif7	1.1E-315	32	20	FVIATLAAIVASQAMISATFSIIKQCLALGCF	K_trans
Motif8	0	50	20	RASKLKRFLEKHKFLKKVLLILVLLGTCMVIGDGVLTPAISVLSAVSGIK	K_trans
Motif9	4.2e-270	29	19	LAYQSLGVVYGDLGTSPLYVFKSTFPKGI	K_trans
Motif10	1.3e-258	31	20	NKIGNAYGJAVVTVMLVTTCLMTLVMILVWK	K_trans
