# Supplementary material for: Genome-wide identification, characterization and expression analysis of HAK genes and decoding their role in responding to potassium deficiency and abiotic stress in Medicago truncatula
Source: PeerJ. 2022 Sep 22;10:e14034. doi: 10.7717/peerj.14034 (PMC9509677; doi:10.7717/peerj.14034)
Supplement: Supplemental Information 4 [file peerj-10-14034-s004.xlsx]

## Sheet: Table-S3
Table S3. Duplications of MtHAK genes between Medicago truncatula and Arabidopsis thaliana.
Code	Mt-Gene 1		At-Gene 2
	Gene ID	Gene name	Gene ID	Gene name
1	Medtr3g094090.1	MtHAK4	AT2G40540	AtKUP2/AtKT2
2	Medtr5g034500.1	MtHAK7	AT1G70300	AtKUP6/AtHAK6/AtKT6
3	Medtr4g094660.1	MtHAK5	AT1G31120	AtKUP10/AtHAK10/AtKT10
4	Medtr2g438150.1	MtHAK2	AT4G19960	AtKUP9/AtHAK9/AtKT9
5	Medtr8g099090.1	MtHAK19	AT4G23640	AtKUP4/AtTRH1/AtKT3
6	Medtr2g008820.1	MtHAK1	AT5G09400	AtKUP7/AtHAK7/AtKT7
7	Medtr5g071827.1	MtHAK10	AT2G30070	AtKUP1/AtKT1
