# Supplementary material for: Genome-wide identification, characterization and expression analysis of HAK genes and decoding their role in responding to potassium deficiency and abiotic stress in Medicago truncatula
Source: PeerJ. 2022 Sep 22;10:e14034. doi: 10.7717/peerj.14034 (PMC9509677; doi:10.7717/peerj.14034)
Supplement: Supplemental Information 5 [file peerj-10-14034-s005.xlsx]

## Sheet: Table-S4
Table S4. Annotation of cis-acting regulatory elements in the promoters of MtHAK genes.
Code	Motif	Function	MtHAK1	MtHAK2	MtHAK3	MtHAK4	MtHAK5	MtHAK6	MtHAK7	MtHAK8	MtHAK9	MtHAK10	MtHAK11	MtHAK12	MtHAK13	MtHAK14	MtHAK15	MtHAK16	MtHAK17	MtHAK18	MtHAK19	MtHAK20
1	TGA-element	auxin-responsive element	1		1		1		1		1				1		1	1	1
2	AuxRR-core	auxin responsiveness					1												1
3	GARE-motif	gibberellin-responsive element																	1
4	P-box	gibberellin-responsive element	2				1	1						1
5	TGACG-motif	cis-acting regulatory element involved in the MeJA-responsiveness		1	1			3	1	2	1		1	1	1	2		2	3		3
6	CGTCA-motif	MeJA-responsivenes		1	1			3	1	2	1		1	1	1	2		2	3		3
7	ERE	ethylene-responsive element	2	1	1			1		1	1		2		3	1		4	1	2	3
8	ABRE	abscisic acid responsiveness	8		4	4		3		2	1		1			2	1	4		3	2
9	TCA-element	salicylic acid responsiveness		1				1	3	2	1	1	2			1	2		1		2
10	STRE	stress-responsive element	1	1	1	1		3			1		2	1	1		1	2	1		5
11	ARE	anaerobic induction	4		1	3	3	2				1	1	3	2	2	1	2	3	1
12	WRE3	wound-responsive element							1	1	1				1		2		1	2
13	WUN-motif	wound-responsive element	4	1			2	1	1			1	1		1		1		1		1
14	MBS	drought-inducibility		1	1		1		2	1			1		2	1	1		2		1
15	LTR	low-temperature responsiveness						1						1						1
16	DRE-core	dehydration-responsive element						1			2
17	DRE1	dehydration-responsive element														1		1
18	TC-rich repeats	cis-acting element involved in defense and stress responsiveness					2				1			1						1	1
19	O2-site	zein metabolism regulation	1		1				1					1	1			1	2
20	GCN4	cis-regulatory element involved in endosperm expression	1		1	1	1
21	AACA_motif	involved in endosperm-specific negative expression			1
22	CAT-box	meristem expression			1	1											1				3
23	CCGTCC-box	cis-acting regulatory element related to meristem specific activation				2													4		2
24	MSA-like	cis-acting element involved in cell cycle regulation													1
25	HD-Zip 1	palisade mesophyll cells element						1
26	RY-element	seed-specific regulation			1
27	LAMP-element	part of a light responsive element	1			1		1										1			1
28	GA-motif	part of a light responsive element	1	1			1		1		3
29	TCCC-motif	part of a light responsive element																2			1
30	3-AF1 binding site	light responsive element																	1
31	GT1-motif	light responsive element		3		1		1	3	4	1		4	3	2	2	2	2	1	2		2
32	TCT-motif	part of a light responsive element	1	1	1		1	1						1				1			1	1
33	ATCT-motif	part of a conserved DNA module involved in light responsiveness	1			1	1	2					1		1							1
34	G-Box	light responsive element	9	3	4	4		3	1	3			2		1	2	1	4	7	4	3
35	AE-box	part of a light responsive module		1				2			1
36	Box 4	part of a conserved DNA module involved in light responsiveness		5	1	2	3	2	4		3		4	1	4	6	5	5	4		3
37	chs-CMA2a	part of a light responsive element		1														1
38	MRE	MYB binding site involved in light responsiveness			1	1							1		1		1			1
39	GATA-motif	part of a light responsive element	1		1				2				1	1			1	1
40	I-box	part of a light responsive element				1		1	1	2	1		1
41	chs-CMA1a	part of a light responsive element						1		1					2
42	ACE	light responsive element							1										1			1
43	AT1-motif	part of a light responsive module													1		2	1
44	ACA-motif	part of gapA in (gapA-CMA1) involved with light responsiveness				1
45	AAAC-motif	light responsive element														1
46	CCAAT-box	MYBHv1 binding site				2					30			12	1	2			3
47	CAAT-box	promoter and enhancer regions	43	68	50	33	47	37	41	41		4	47		42	35	45	47	44	32	38	30
48	MYB	MYB-like sequence	3	4		4													1
49	TATA-box	around -30 of transcription start	57	107	45	47	58	58	68	35	42	3	44	31	38	85	43	51	52	33	57	41
50	AT-rich element	binding site of AT-rich DNA binding protein			1	1			1						1			1
51	GC-motif	enhancer-like element involved in anoxic specific inducibility						1			1
52	HMG-TATA-region	cis-acting regulatory element							1
53	HD-Zip 3	protein binding site													1
54	A-box	cis-acting regulatory element																	2		1
55	W box	Unkown	1		1	2		2	1		1		2		3		3	2		2
56	AT~TATA-box	Unkown	5							4			4	1			4
57	as-1	Unkown		2	1			3	1	2	1		1	1	1	2		2	3		3
58	Myb-binding site	Unkown	1								1				1		1		1	1
59	AP-1	Unkown					1												1
60	AC-II	Unkown							1
61	NON	Unkown													1
62	ABRE4	Unkown	1	6		2									2				6	1
63	ABRE3a	Unkown	1	2		2									1					1
64	Box III	Unkown	1			1			1		1
65	CARE	Unkown
66	box S	Unkown																	1
67	MYC	Unkown	5	1	5	2	7	2	2	5	6		6	4	2	4	4	3	6	6	5
68	F-box	Unkown					1								1
69	AAGAA-motif	Unkown		2	2	7	2	1	2		2		6	1	1	2	9			1
70	MYB-like sequence	Unkown		1	1	2			1		4		1	3			3			2
71	AT~TATA-box	Unkown		13	6	4	4	3	18		3				4	15		5			5
72	MYB recognition site	Unkown				2									1	15			3
73	Myb	Unkown	2		2	3	2	2	3	3	7		3	6	7	8	6	1	3	5	1	2
