# Supplementary material for: Genome-wide identification, characterization and expression analysis of HAK genes and decoding their role in responding to potassium deficiency and abiotic stress in Medicago truncatula
Source: PeerJ. 2022 Sep 22;10:e14034. doi: 10.7717/peerj.14034 (PMC9509677; doi:10.7717/peerj.14034)
Supplement: Supplemental Information 6 [file peerj-10-14034-s006.xlsx]

## Sheet: Table-S5
Table S5. Microarray data of MtHAK genes in different organs and developmental stages.
Probeset	Genes	Root	Stem	Vegetative bud	Leaf	Petiole	Flower	Pod	Seed 10 DAP	Seed 12 DAP	Seed 16 DAP	Seed 20 DAP	Seed 24 DAP	Seed 36 DAP
Mtr.9321.1.S1_at	MtHAK2	485.08	199.784	120.237	860.691	454.443	274.795	225.921	23.0239	15.6996	29.5297	77.3445	172.239	170.633
Mtr.41449.1.S1_at	MtHAK3	1368.78	533.856	342.618	1748.78	1269.39	870.418	596.058	47.7993	42.849	103.123	391.479	629.211	621.797
Mtr.10999.1.S1_at	MtHAK4	1672.73	1162.64	1525.98	1403.84	853.45	1644.95	1888.03	1757.63	1919.04	1630.93	1756.54	1781.59	332.896
Mtr.3419.1.S1_at	MtHAK5	155.936	409.377	737.936	741.173	591.138	395.91	820.754	1477.52	1638.41	2121.61	4037.29	4577.44	1795.31
Mtr.40509.1.S1_at	MtHAK6	5740.49	22.7835	10.1662	9.09235	15.9037	8.12551	8.14687	7.72134	8.70915	6.47144	9.79075	8.29617	8.49186
Mtr.9837.1.S1_at	MtHAK7	295.726	164.117	155.329	258.359	293.623	201.993	65.7694	313.158	275.17	230.613	343.732	397.05	831.426
Mtr.31488.1.S1_at	MtHAK8	237.453	347.983	273.283	200.046	263.159	327.302	356.713	996.04	982.707	693.523	857.616	961.971	740.573
Mtr.40771.1.S1_at	MtHAK12	801.432	585.418	390.817	1533.51	1259.09	808.851	456.58	1122.88	1714.56	2618.92	3391.42	3731.81	1058.5
Mtr.33886.1.S1_at	MtHAK13	240.593	121.33	134.093	375.353	303.776	532.033	127.926	246.037	264.192	262.503	350.182	400.066	402.526
Mtr.46517.1.S1_at	MtHAK15	7.58328	7.31654	12.2343	8.3512	7.15459	38.0859	47.7669	1059.28	522.216	434.031	201.183	104.709	11.6395
Mtr.3810.1.S1_at	MtHAK16	1208.9	405.93	580.864	597.685	443.062	360.534	543.75	378.501	321.026	253.728	310.962	304.856	258.663
Mtr.24768.1.S1_s_at	MtHAK18	10.0906	11.7821	11.377	12.7775	10.8958	12.4769	12.4589	14.2351	13.1448	12.114	11.4456	12.9986	11.5872
Mtr.39674.1.S1_at	MtHAK19	361.78	344.437	228.641	209.9	293.538	207.993	276.288	400.491	417.554	320.621	387.413	393.49	318.676
